# Supplementary material
Source: MDPI journal article supplement (https://www.mdpi.com/2227-9717/11/6/1837)
Supplement: s1 [file s1]

## **Supplementary Materials:**

**Synthesis, Molecular docking, Molecular Dynamics studies, and In vitro Biological evaluation of new biofunctional ketoprofen derivatives with different *N*-containing heterocycles**

**Stanimir Manolov, Dimitar Bojilov, Iliyan Ivanov, Gabriel Marc, Nadejda Bataklieva, Smaranda Oniga, Ovidiu Oniga, and Paraskev Nedyalkov**

### **Table of Contents:**

|                                                                      |                |
|----------------------------------------------------------------------|----------------|
| <b>Figure S1.</b> <sup>1</sup> H-NMR spectrum of compound <b>3a</b>  | page <b>4</b>  |
| <b>Figure S2.</b> <sup>1</sup> H-NMR spectrum of compound <b>3b</b>  | page <b>5</b>  |
| <b>Figure S3.</b> <sup>1</sup> H-NMR spectrum of compound <b>3c</b>  | page <b>6</b>  |
| <b>Figure S4.</b> <sup>1</sup> H-NMR spectrum of compound <b>3d</b>  | page <b>7</b>  |
| <b>Figure S5.</b> <sup>13</sup> C-NMR spectrum of compound <b>3a</b> | page <b>8</b>  |
| <b>Figure S6.</b> <sup>13</sup> C-NMR spectrum of compound <b>3b</b> | page <b>9</b>  |
| <b>Figure S7.</b> <sup>13</sup> C-NMR spectrum of compound <b>3c</b> | page <b>10</b> |

|                                                                                                                                                                                          |                |
|------------------------------------------------------------------------------------------------------------------------------------------------------------------------------------------|----------------|
| <b>Figure S8.</b> $^{13}\text{C}$ -NMR spectrum of compound <b>3d</b>                                                                                                                    | page <b>11</b> |
| <b>Figure S9.</b> UV spectrum of compound <b>3a</b>                                                                                                                                      | page <b>12</b> |
| <b>Figure S10.</b> UV spectrum of compound <b>3b</b>                                                                                                                                     | page <b>13</b> |
| <b>Figure S11.</b> UV spectrum of compound <b>3c</b>                                                                                                                                     | page <b>14</b> |
| <b>Figure S12.</b> UV spectrum of compound <b>3d</b>                                                                                                                                     | page <b>15</b> |
| <b>Figure S13.</b> ESI-HRMS of compound <b>3a</b>                                                                                                                                        | page <b>16</b> |
| <b>Figure S14.</b> Mass spectrum of <b>3a</b> obtained by positive ion ESI-MS/MS                                                                                                         | page <b>17</b> |
| <b>Figure S15.</b> ESI-HRMS of compound <b>3b</b>                                                                                                                                        | page <b>18</b> |
| <b>Figure S16.</b> Mass spectrum of <b>3b</b> obtained by positive ion ESI-MS/MS                                                                                                         | page <b>19</b> |
| <b>Figure S17.</b> ESI-HRMS of compound <b>3c</b>                                                                                                                                        | page <b>20</b> |
| <b>Figure S18.</b> Mass spectrum of <b>3c</b> obtained by positive ion ESI-MS/MS                                                                                                         | page <b>21</b> |
| <b>Figure S19.</b> ESI-HRMS of compound <b>3d</b>                                                                                                                                        | page <b>22</b> |
| <b>Figure S20.</b> Mass spectrum of <b>3d</b> obtained by positive ion ESI-MS/MS                                                                                                         | page <b>23</b> |
| <b>Table S1.</b> RMSD of protein backbone, RMSD of ligands and RG of protein in the molecular dynamics study when ligands <b>3c</b> and <b>3d</b> were docked into the Sudlow 2 site     | page <b>24</b> |
| <b>Table S2.</b> RMSD of protein backbone, RMSD of ligands and RG of protein in the molecular dynamics study when ligands <b>3a</b> and <b>3b</b> were docked into the site 3 of albumin | page <b>26</b> |

**Table S3.** RMSD of protein backbone, RMSD of ligands and RG of protein in the molecular dynamics study when ligands **3c** and **3d** were docked into the site 3 of albumin page **28**

**Table S4.** RMSD of protein backbone, RMSD of ligands and RG of protein in the molecular dynamics study when ligands **3c** and **3d** were docked into the cleft of albumin page **30**

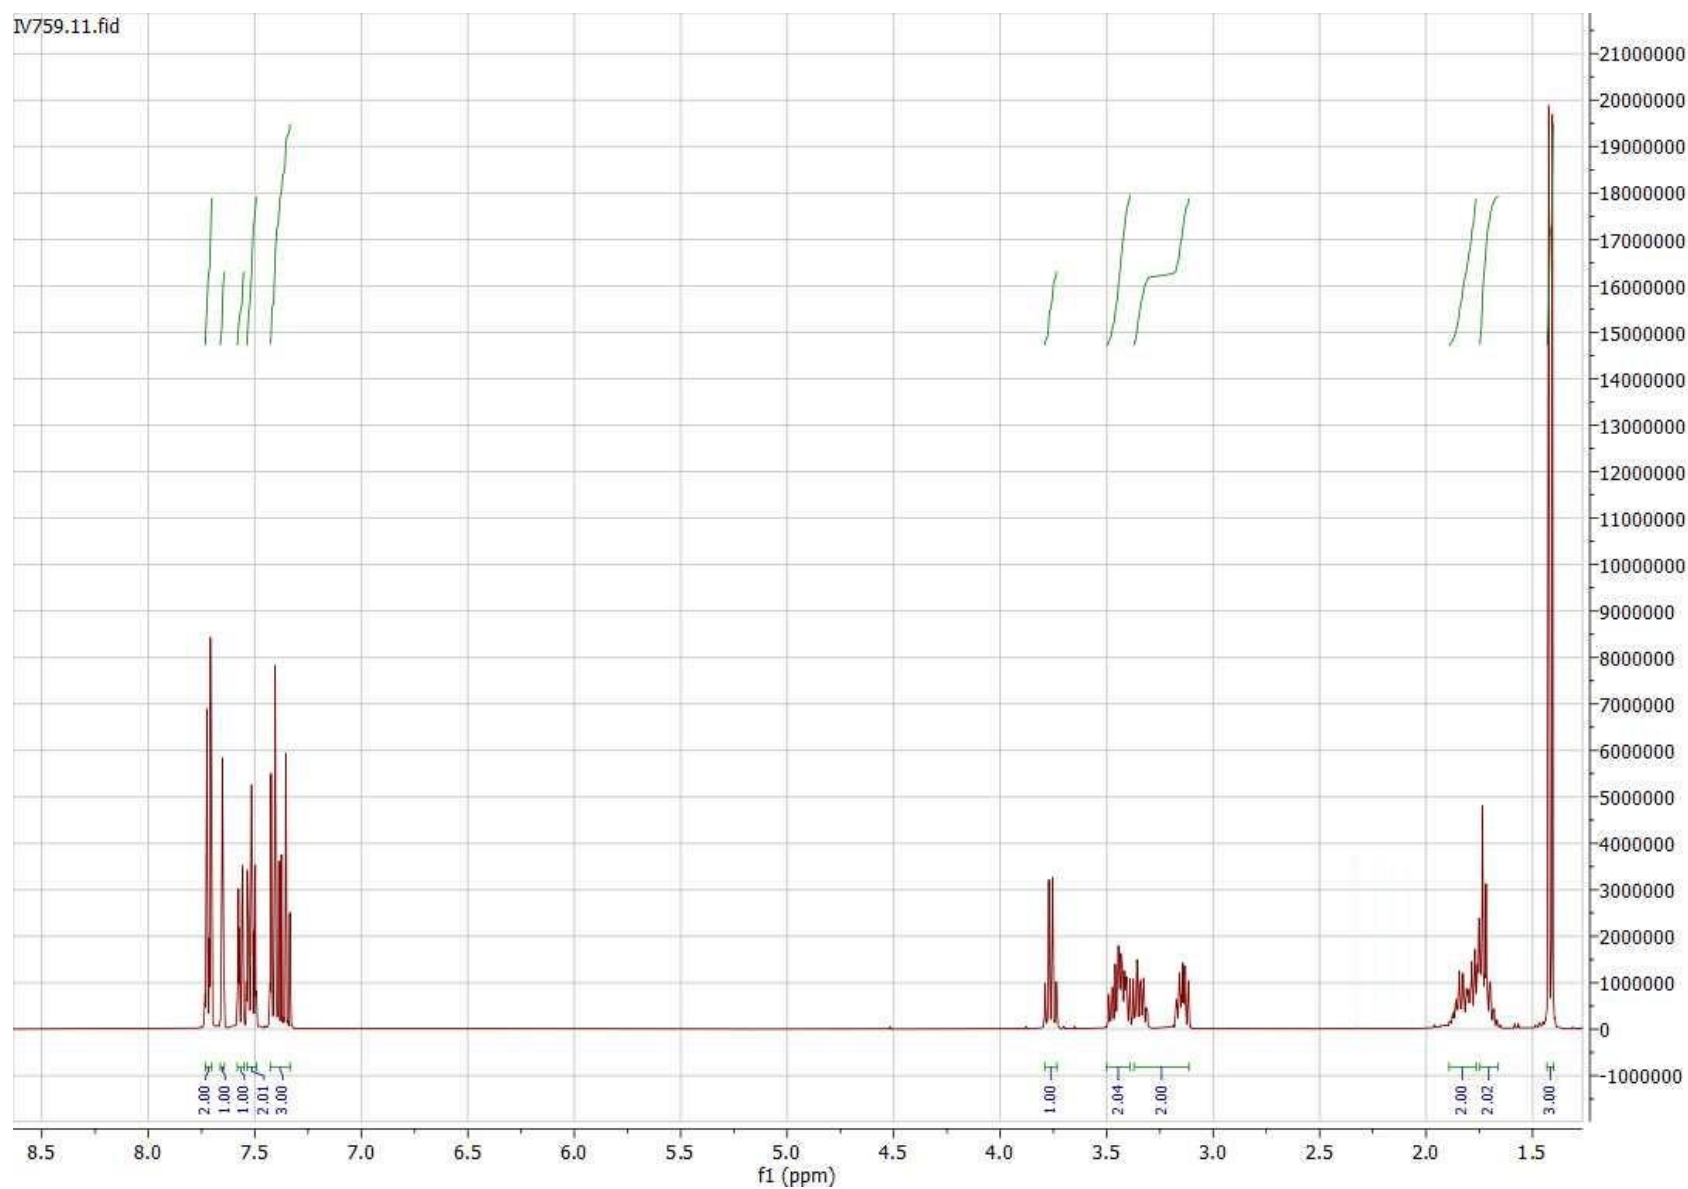

**Figure S1.**  $^1\text{H}$ -NMR spectrum of compound **3a**.

**Figure S2.**  $^1\text{H}$ -NMR spectrum of compound **3b**.

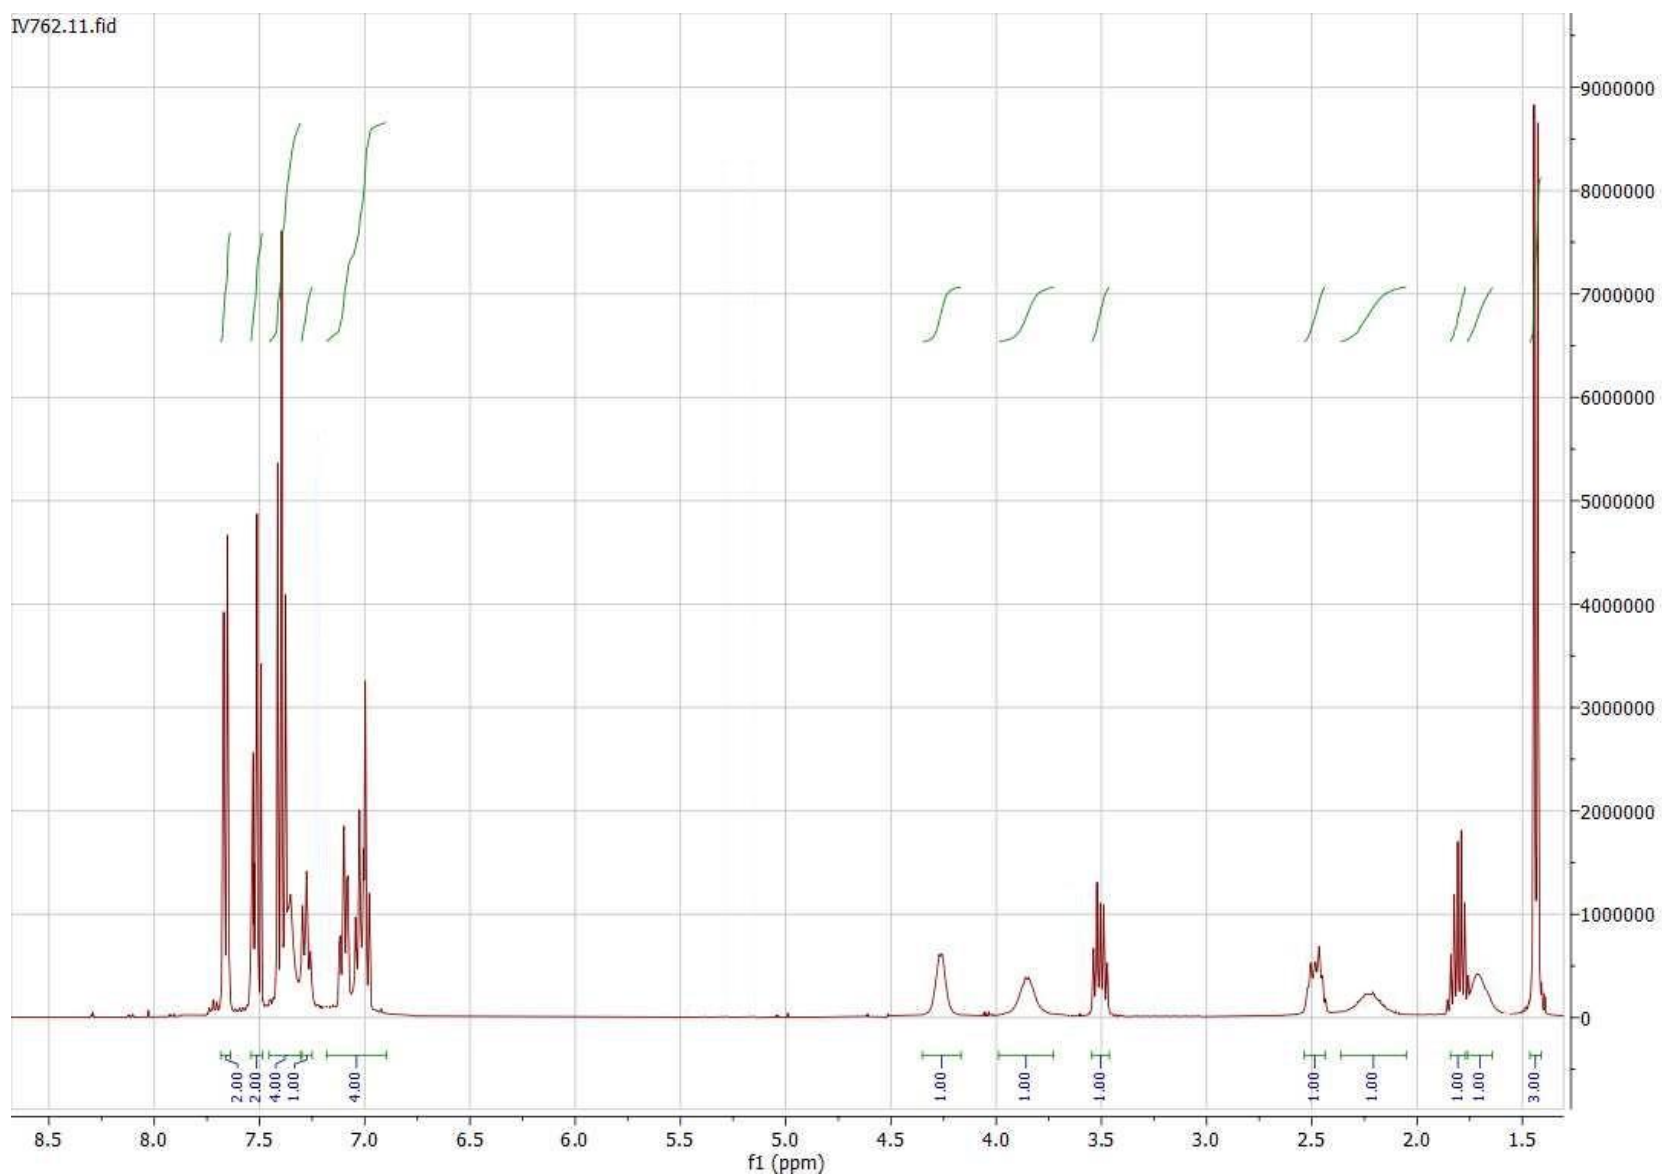

**Figure S3.**  $^1\text{H}$ -NMR spectrum of compound **3c**.

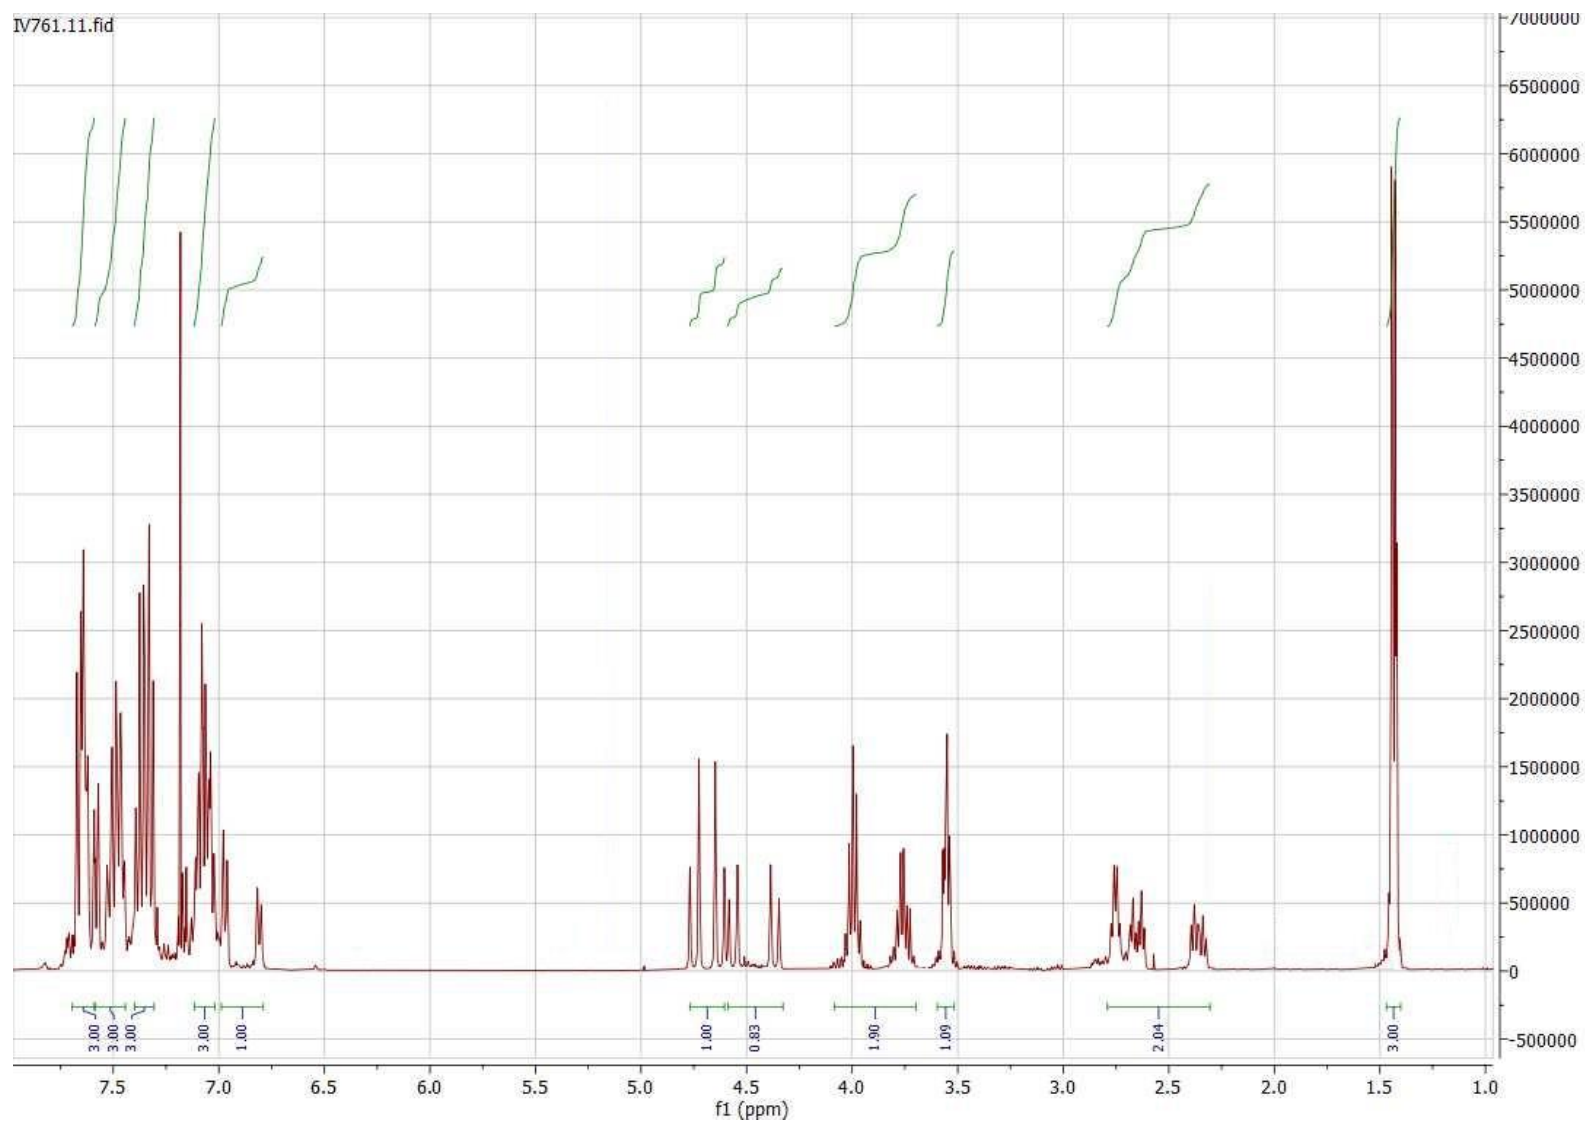

**Figure S4.**  $^1\text{H}$ -NMR spectrum of compound **3d**.

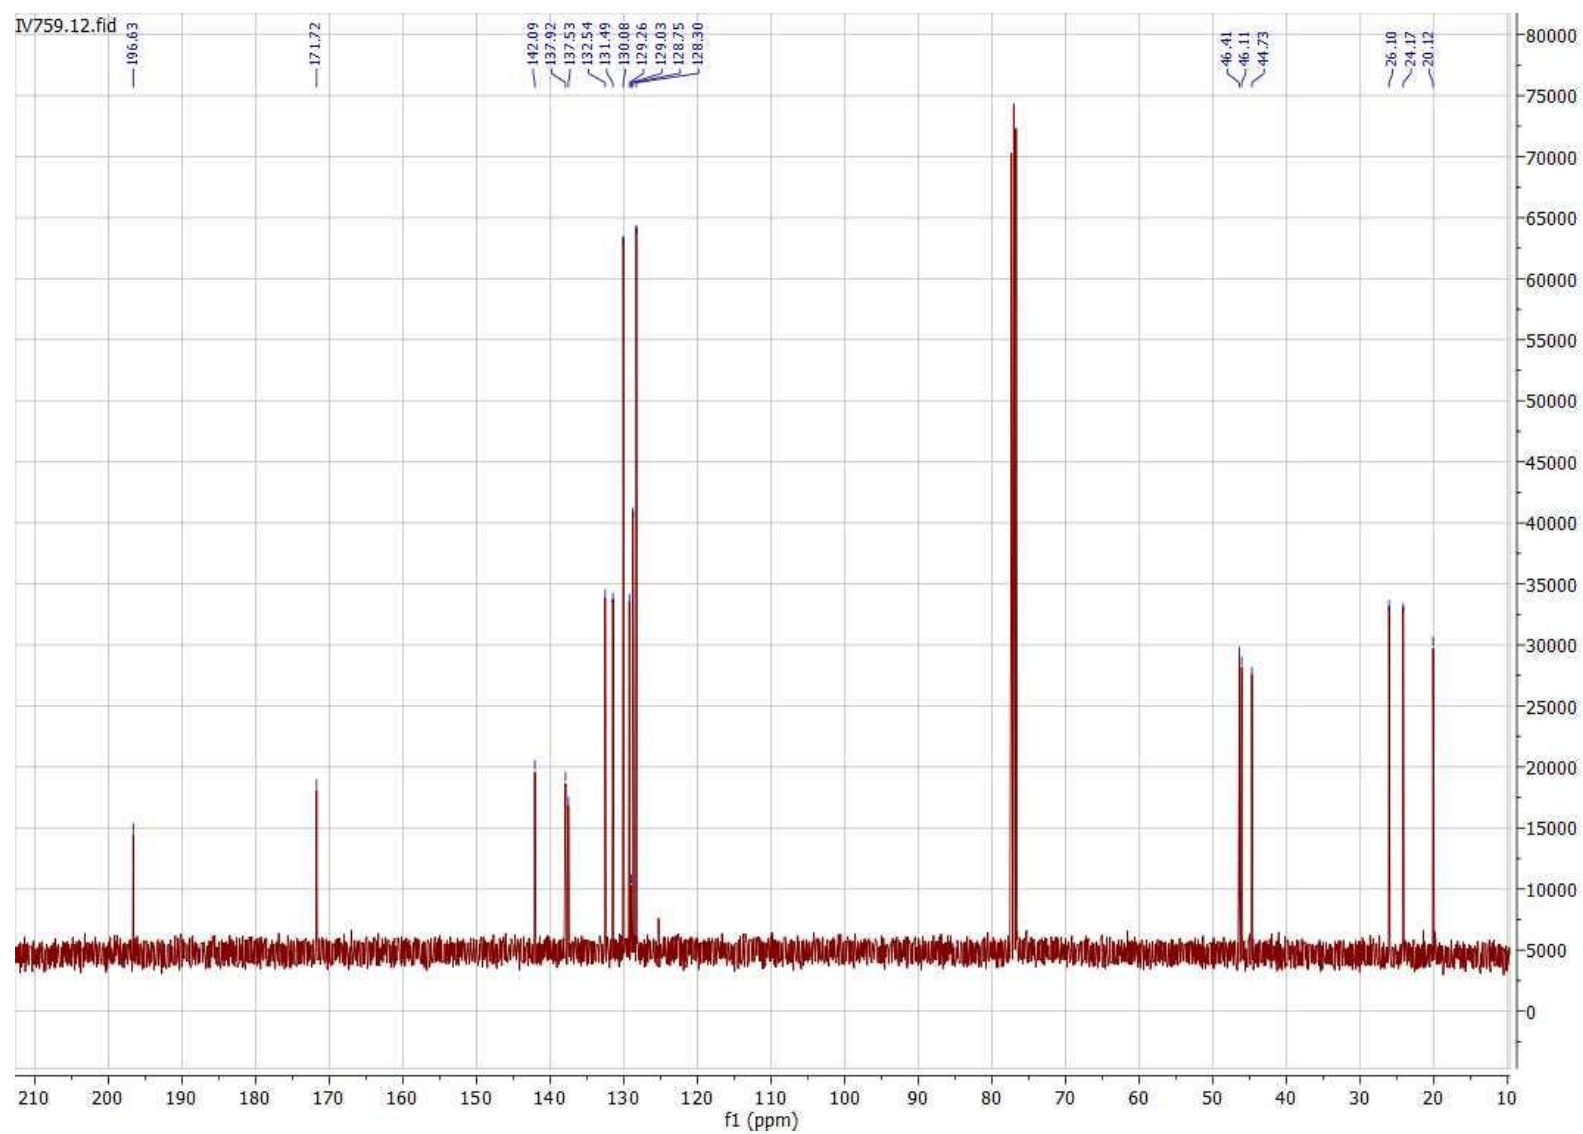

**Figure S5.**  $^{13}\text{C}$ -NMR spectrum of compound 3a.

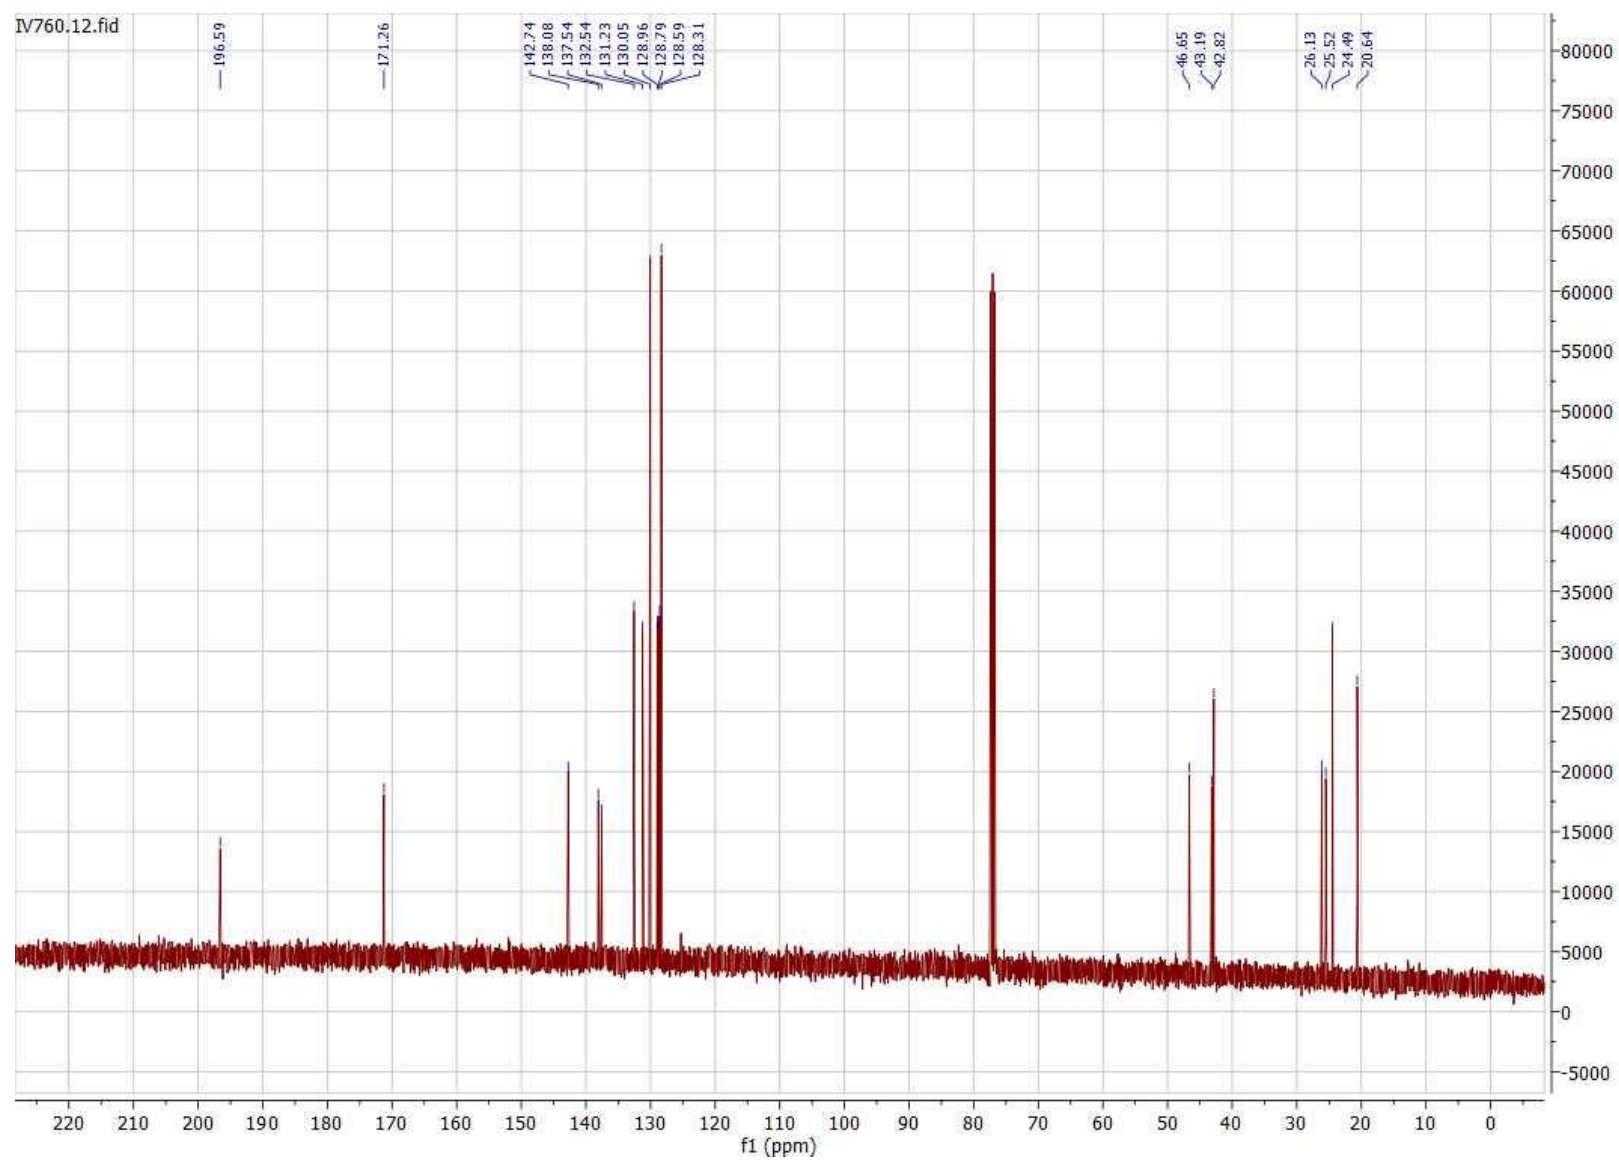

**Figure S6.**  $^{13}\text{C}$ -NMR spectrum of compound 3b.

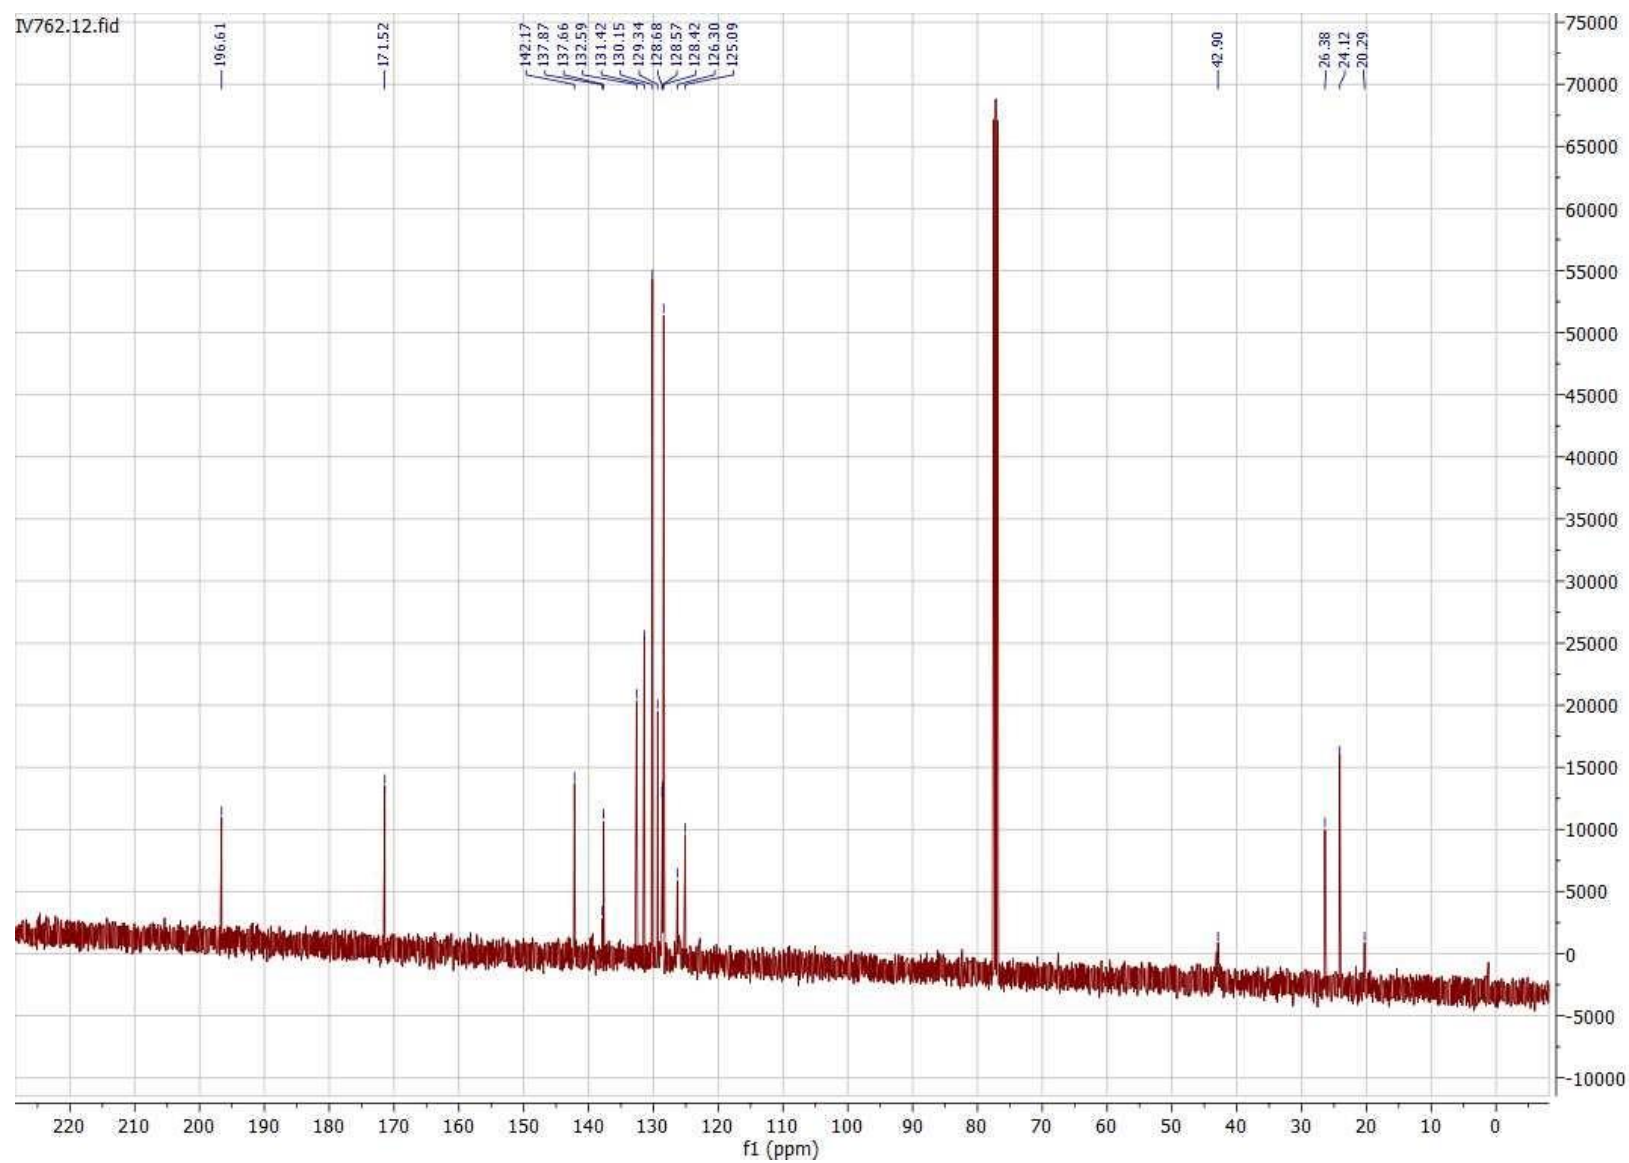

**Figure S7.**  $^{13}\text{C}$ -NMR spectrum of compound **3c**.

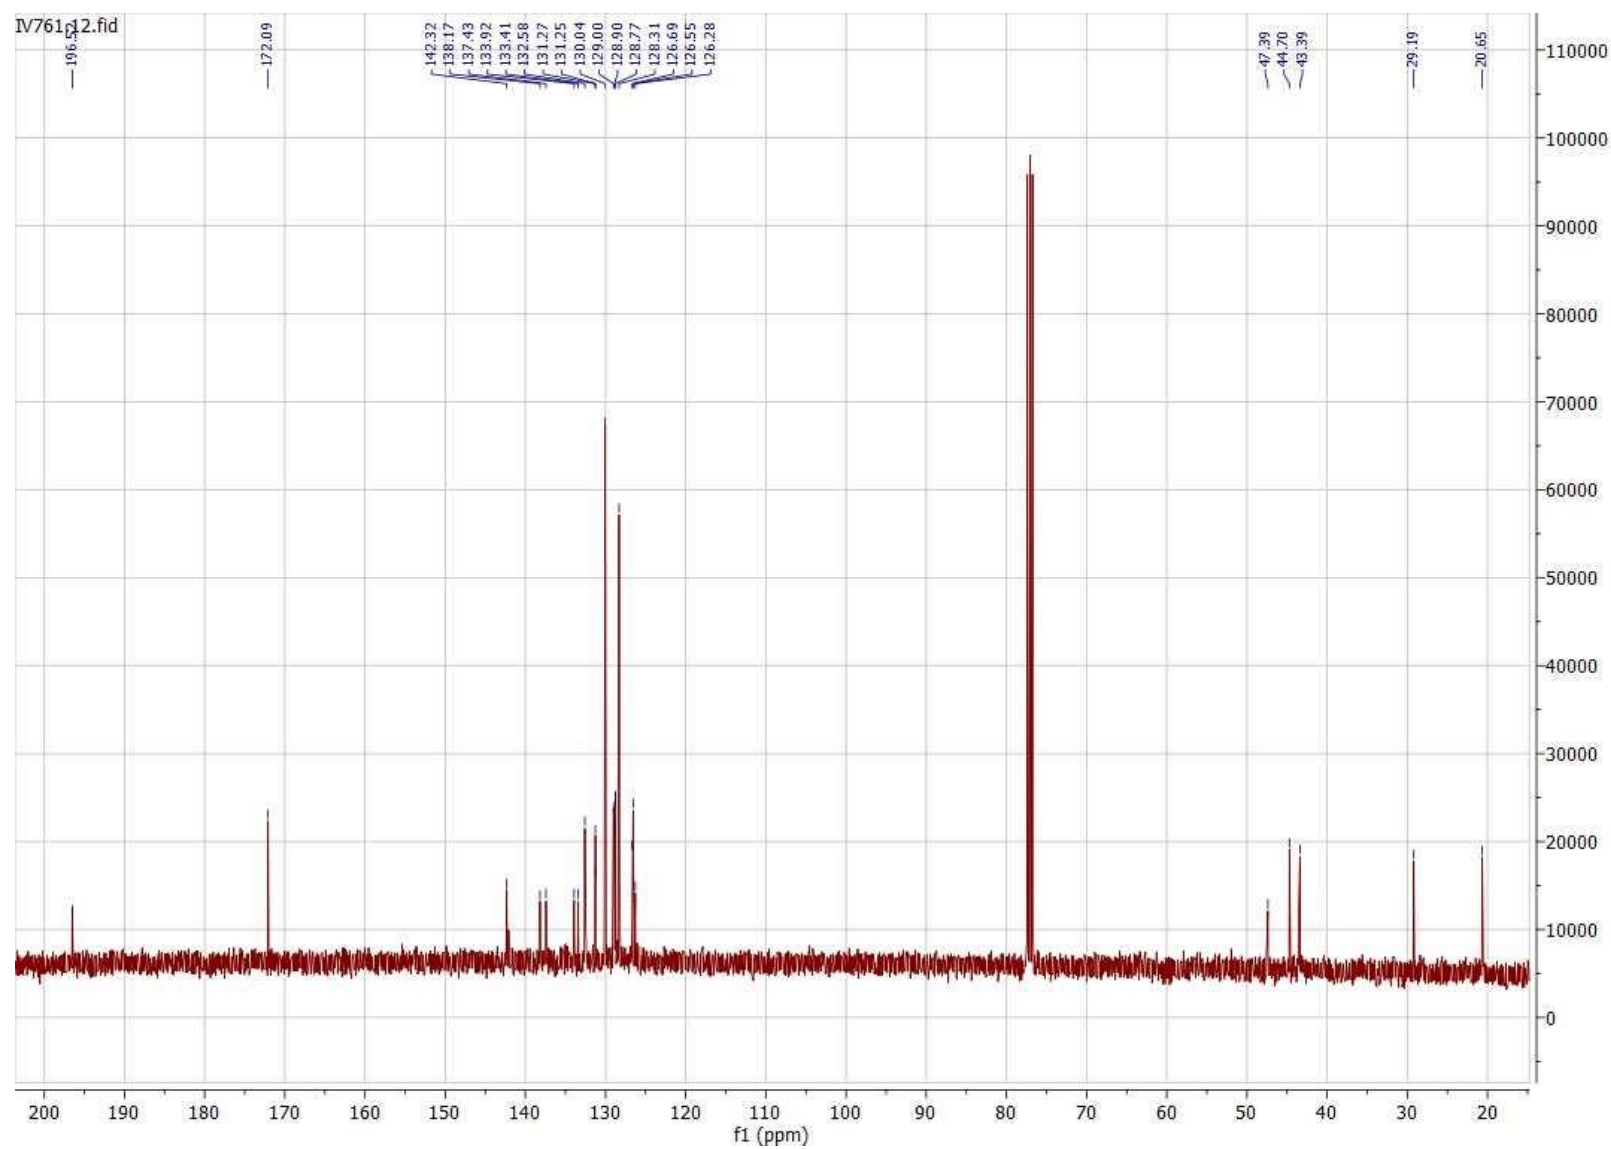

**Figure S8.** <sup>13</sup>C-NMR spectrum of compound **3d**.

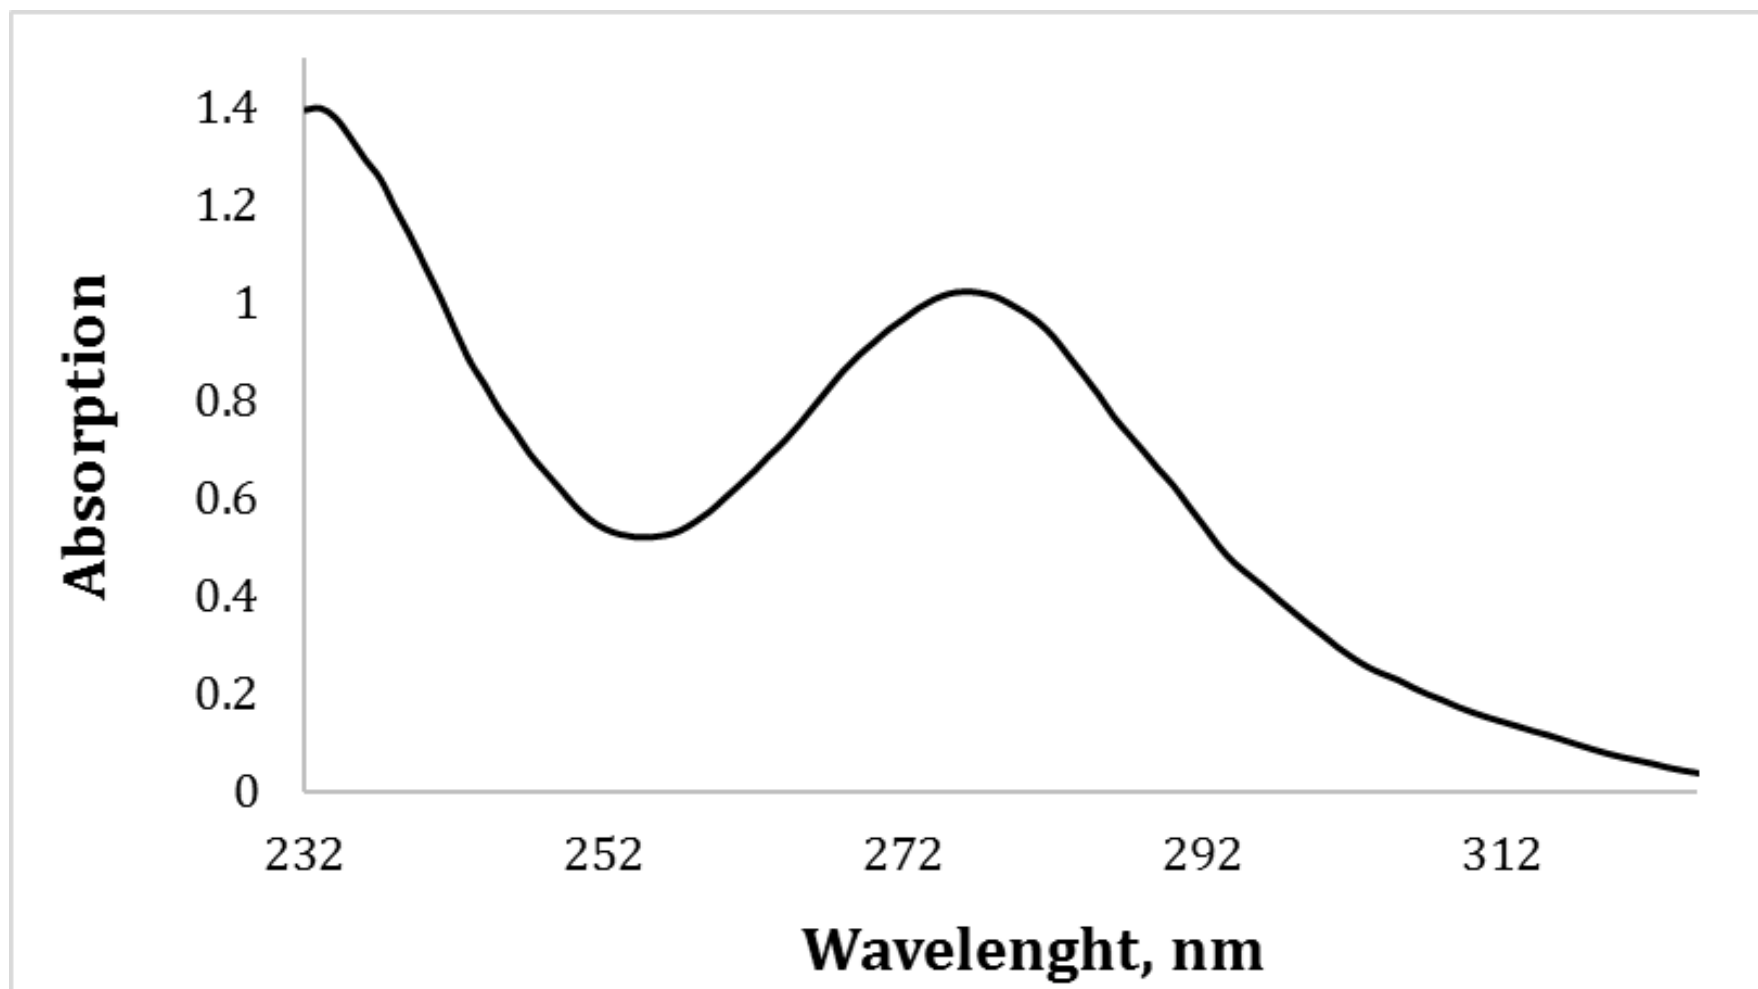

**Figure S9.** UV spectrum of compound 3a.

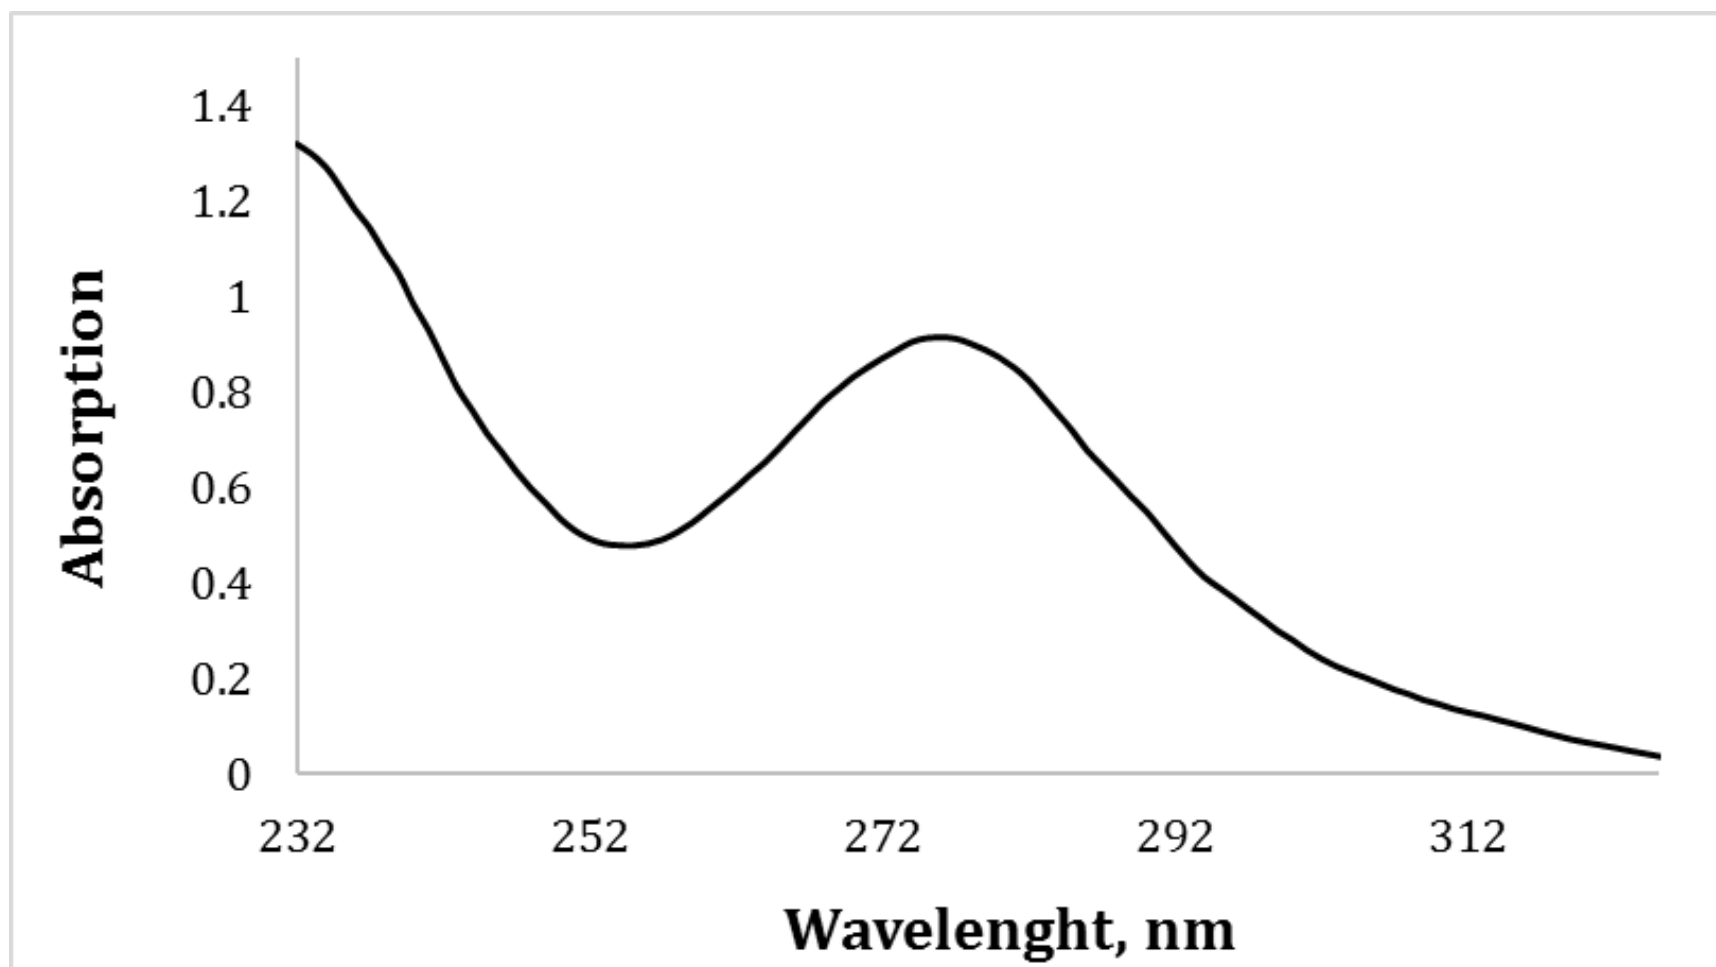

**Figure S10.** UV spectrum of compound **3b**.

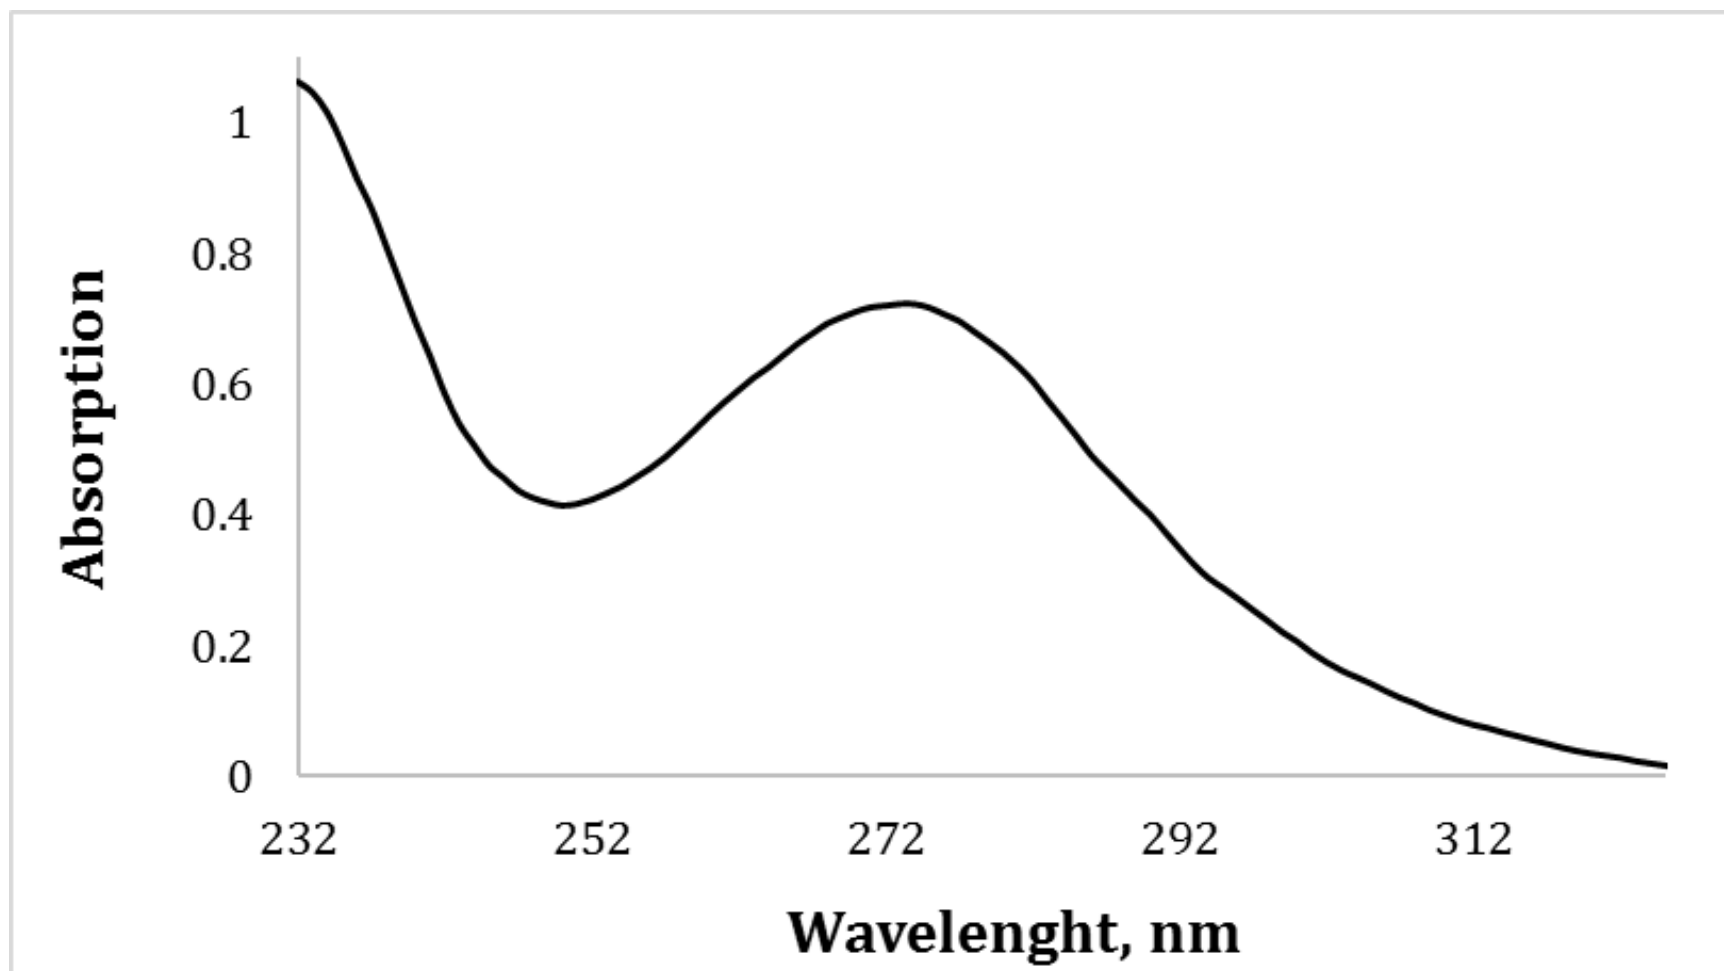

**Figure S11.** UV spectrum of compound **3c**.

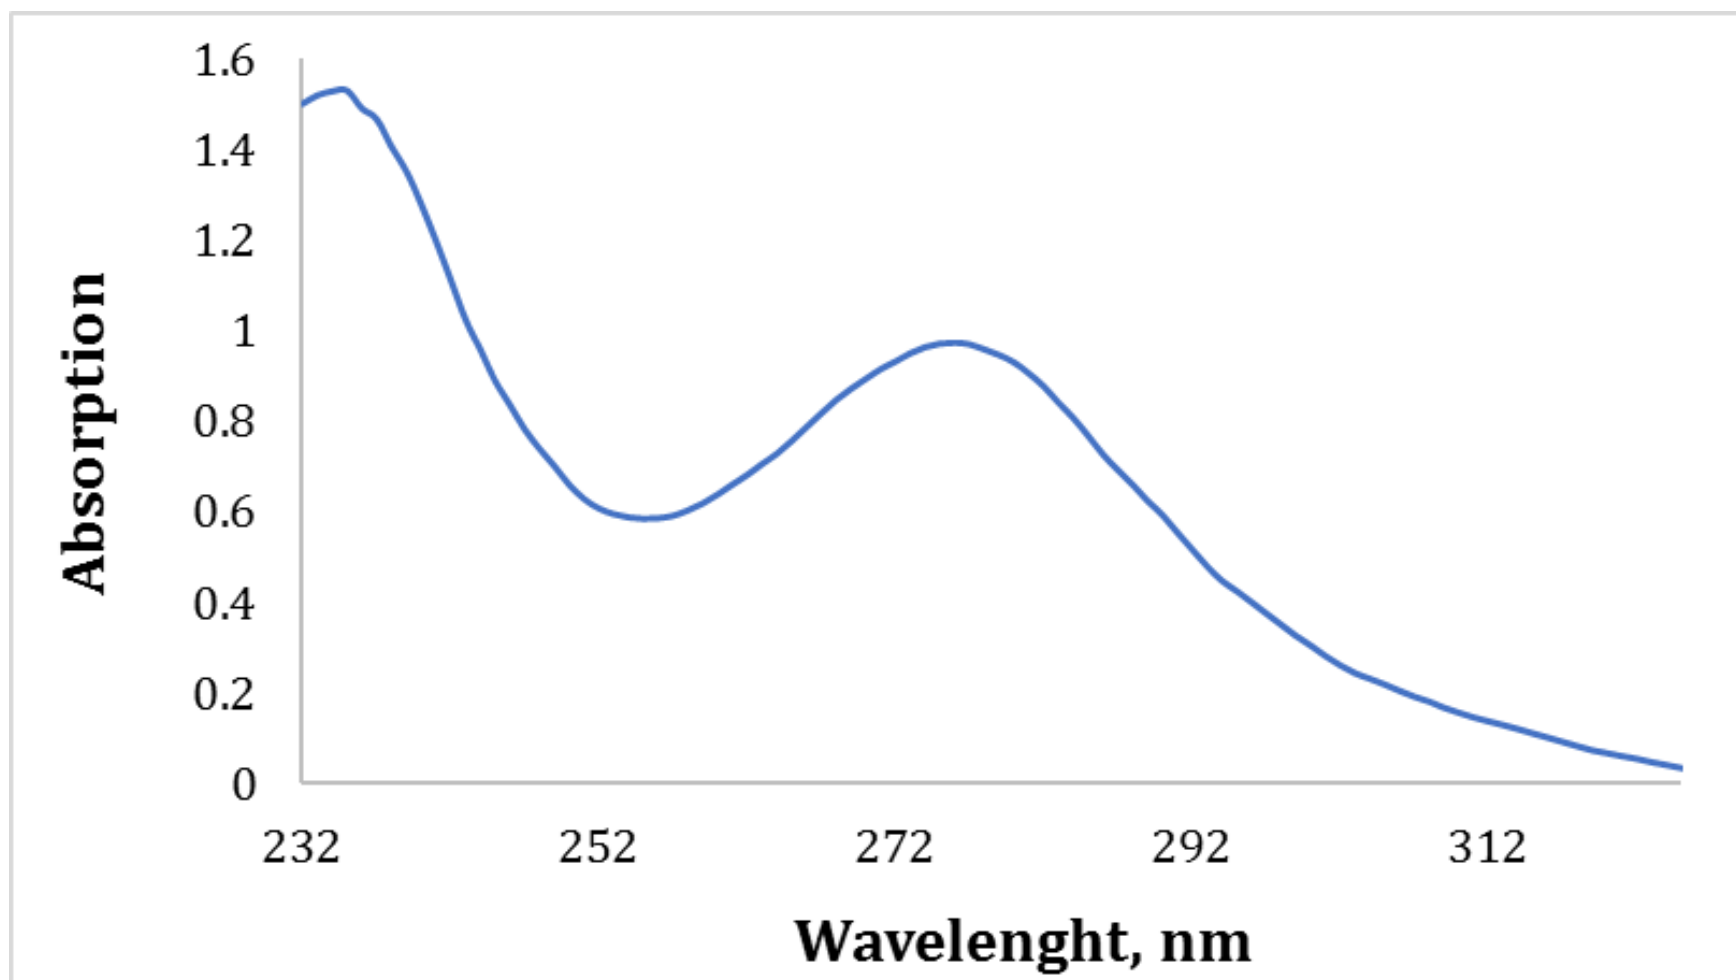

**Figure S12.** UV spectrum of compound **3d**.

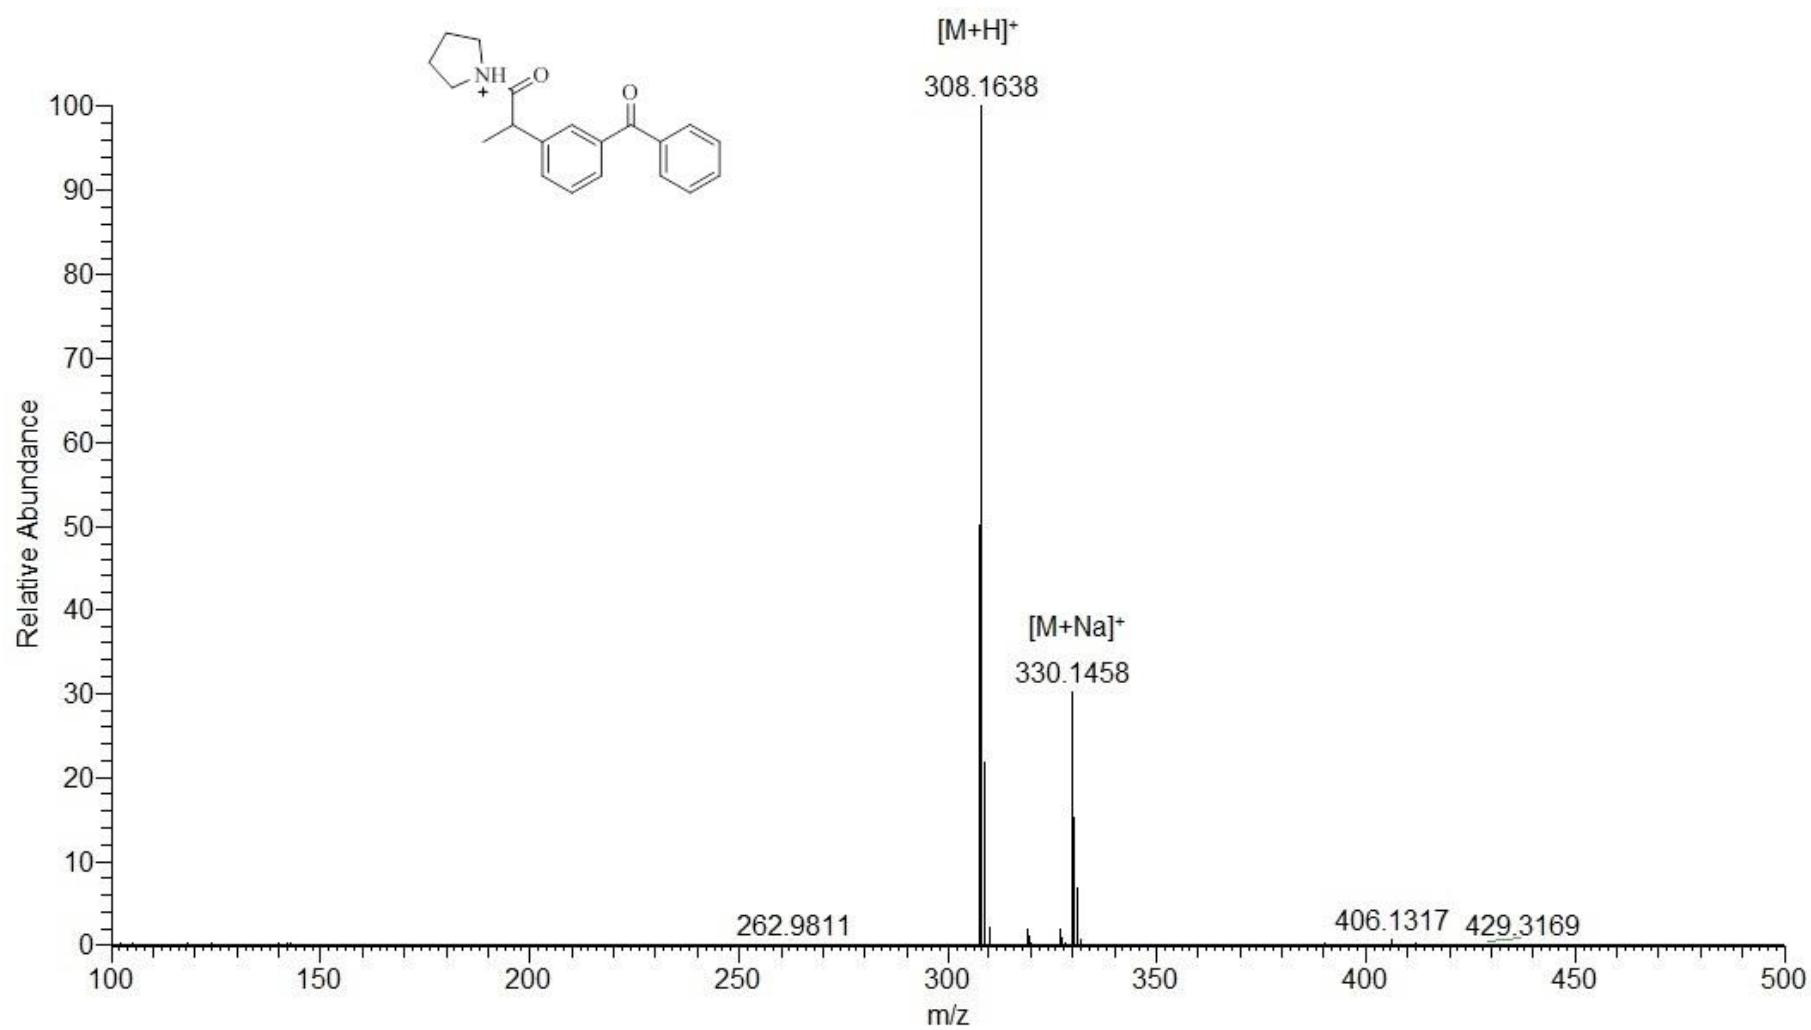

**Figure S13.** ESI-HRMS of compound **3a**.

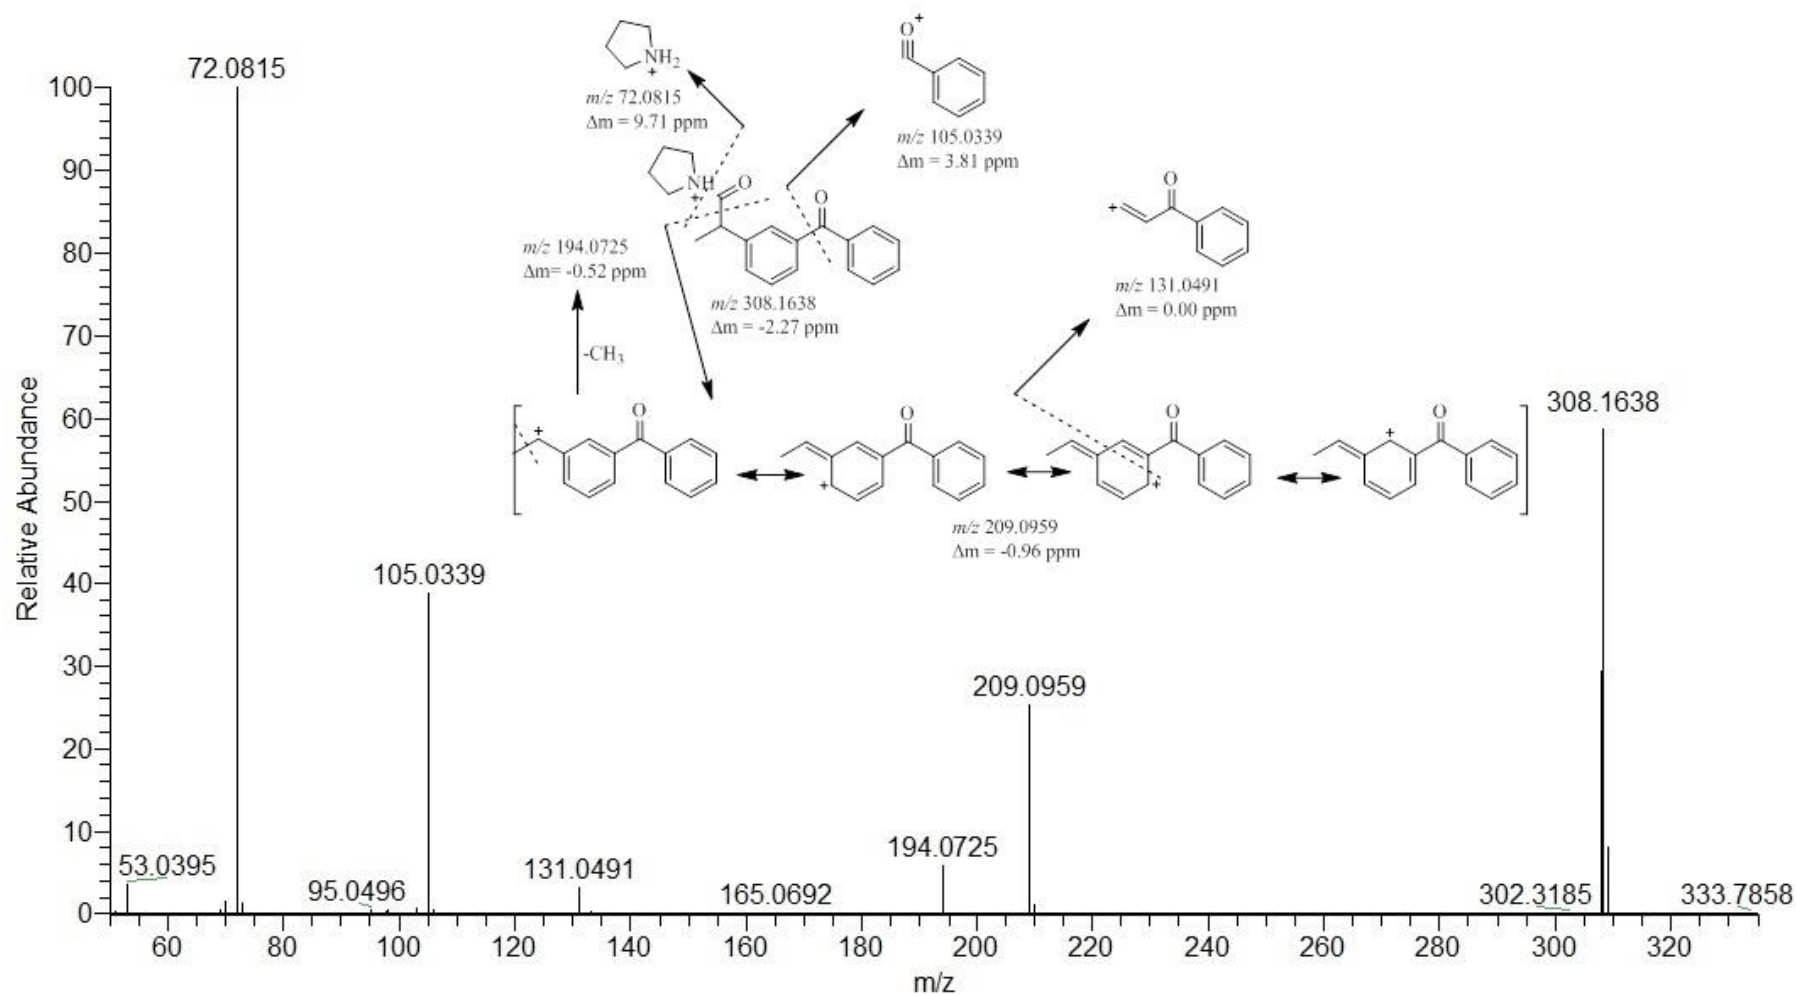

**Figure S14** Mass spectrum of **4a** obtained by positive ion ESI-MS/MS. Proposed fragmentation of protonated **3a**.

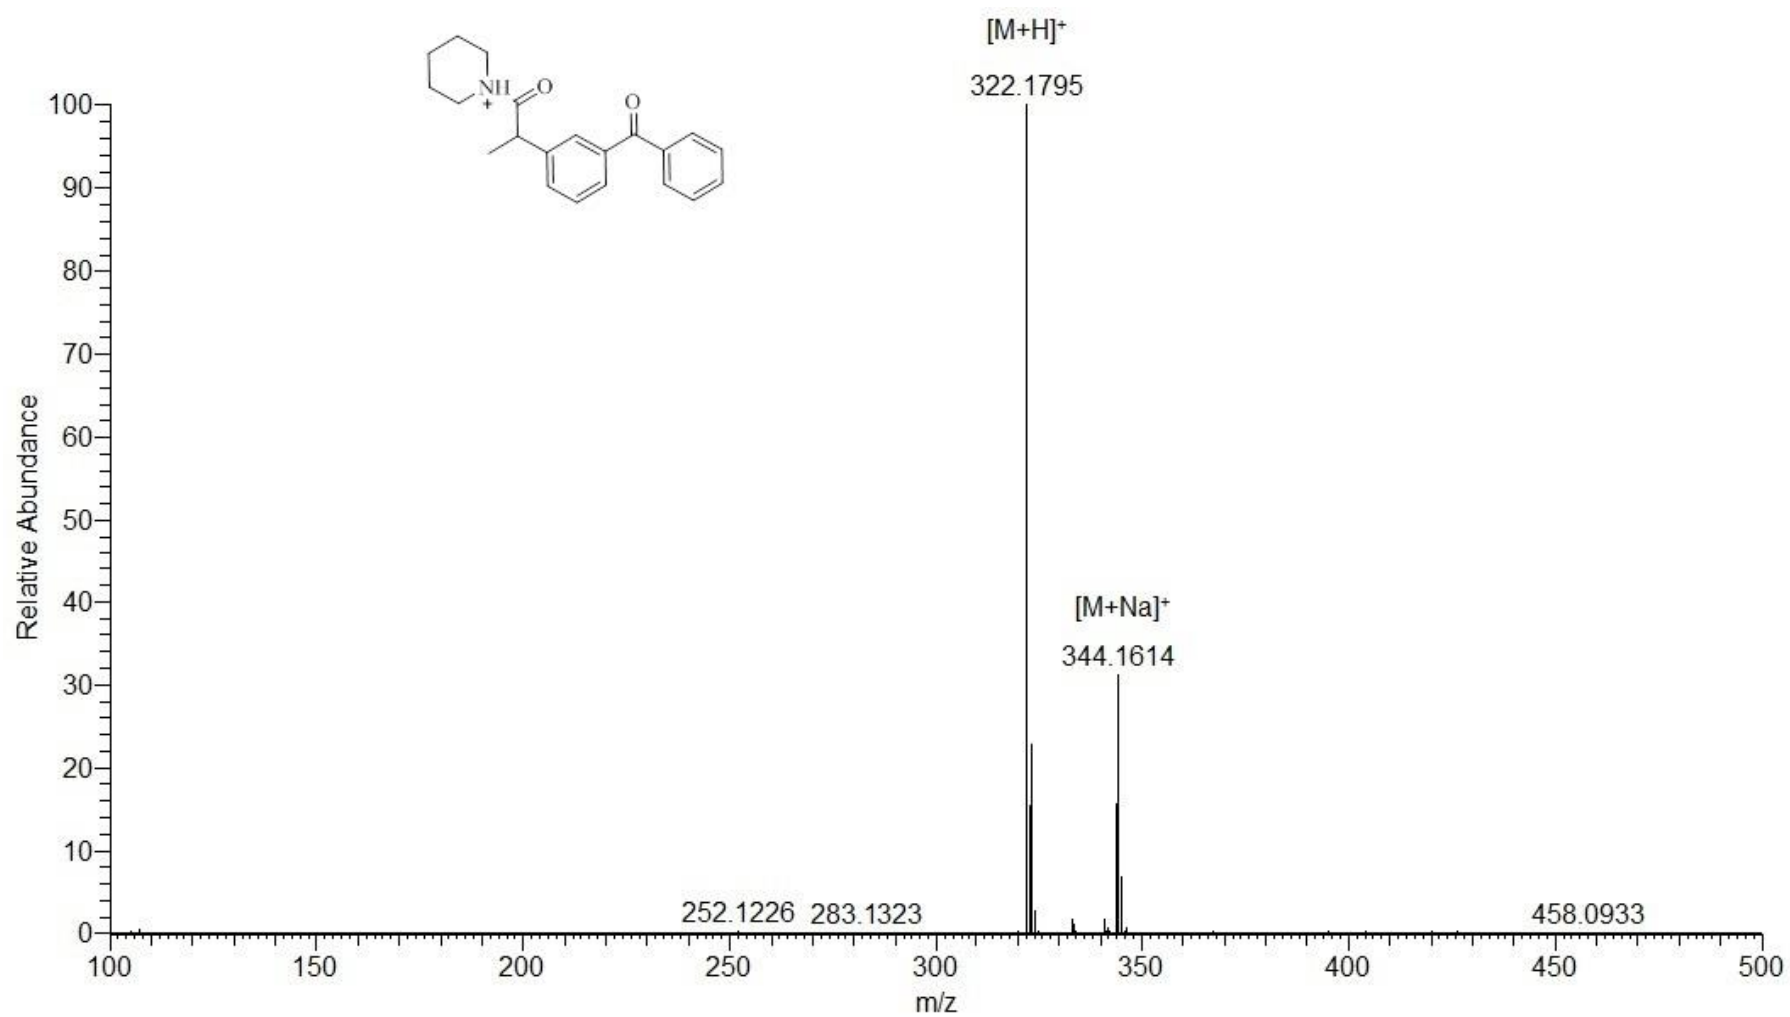

**Figure S15.** ESI-HRMS of compound **3b**.

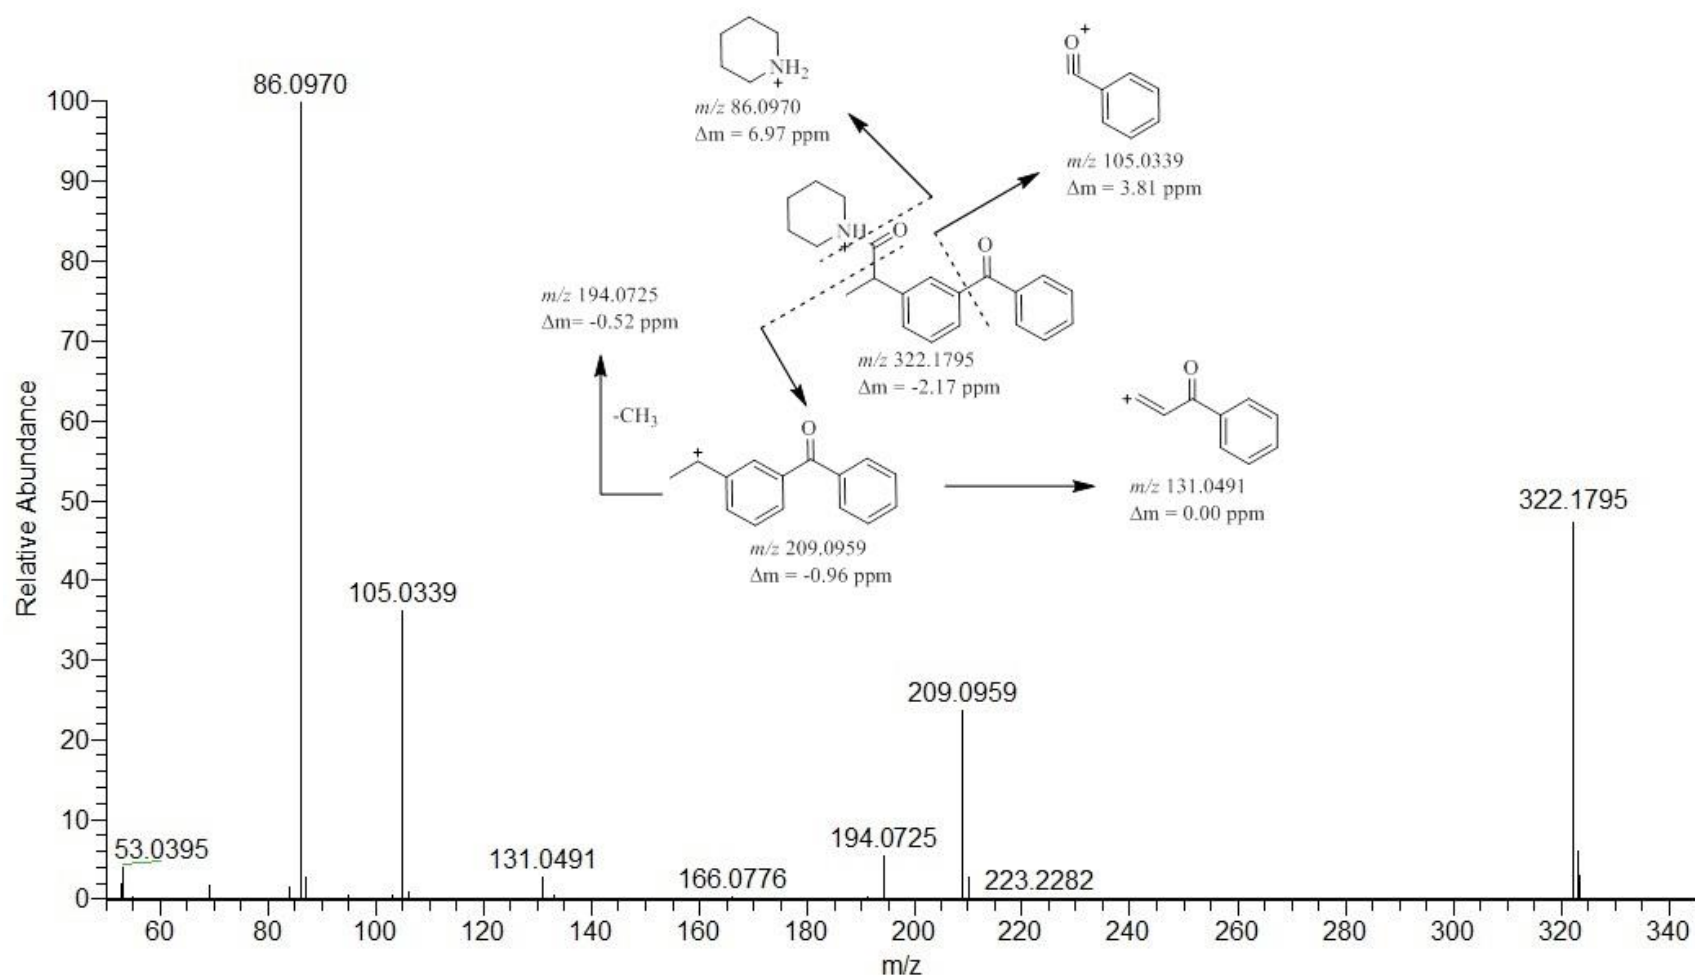

**Figure S16** Mass spectrum of **4b** obtained by positive ion ESI-MS/MS. Proposed fragmentation of protonated **3b**.

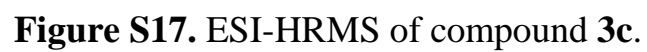

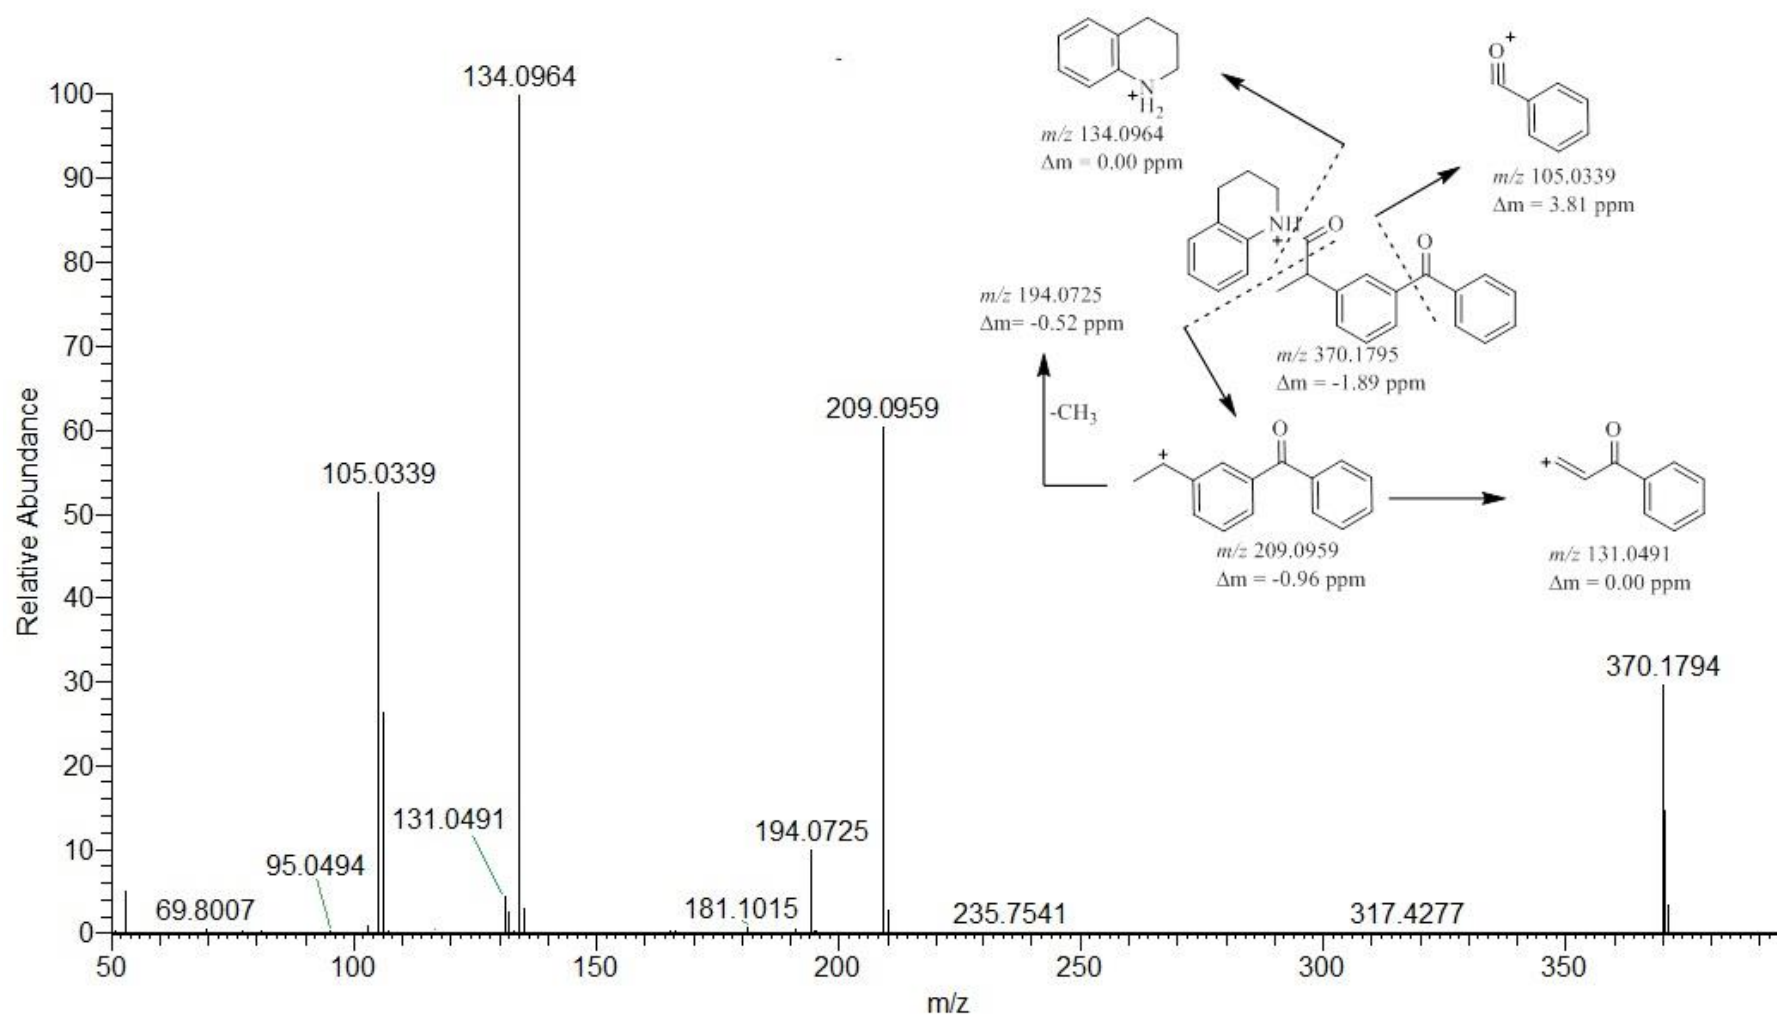

**Figure S18** Mass spectrum of **4c** obtained by positive ion ESI-MS/MS. Proposed fragmentation of protonated **3c**.

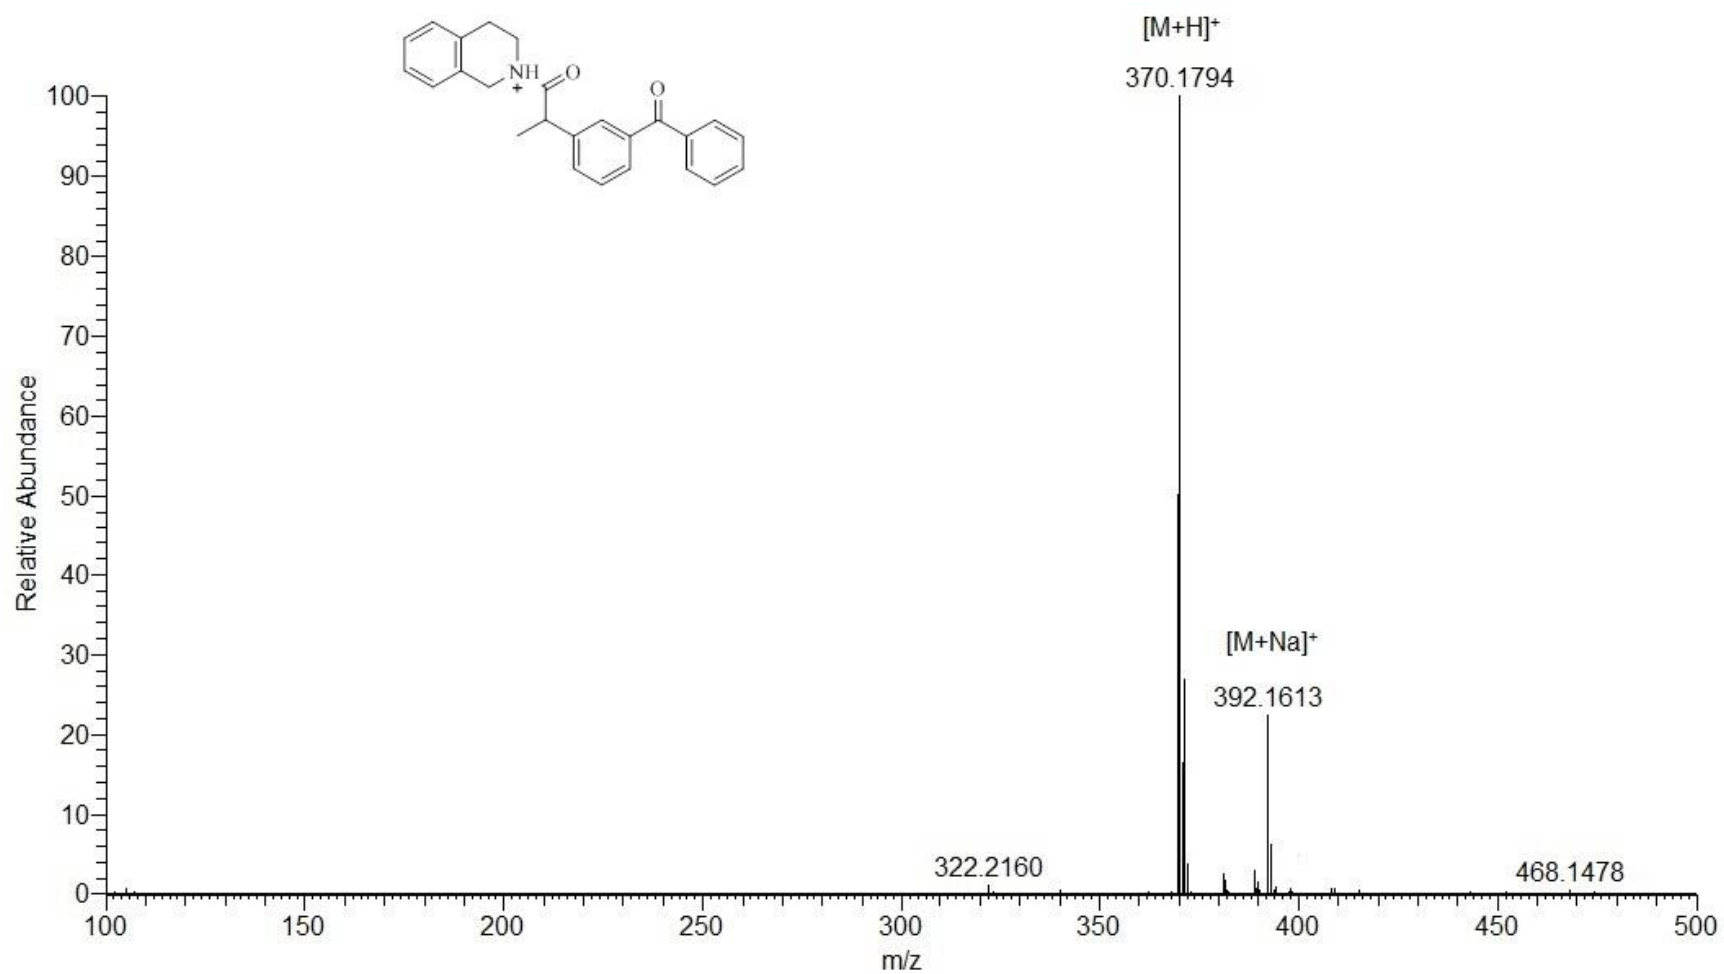

**Figure S19.** ESI-HRMS of compound **3d**.

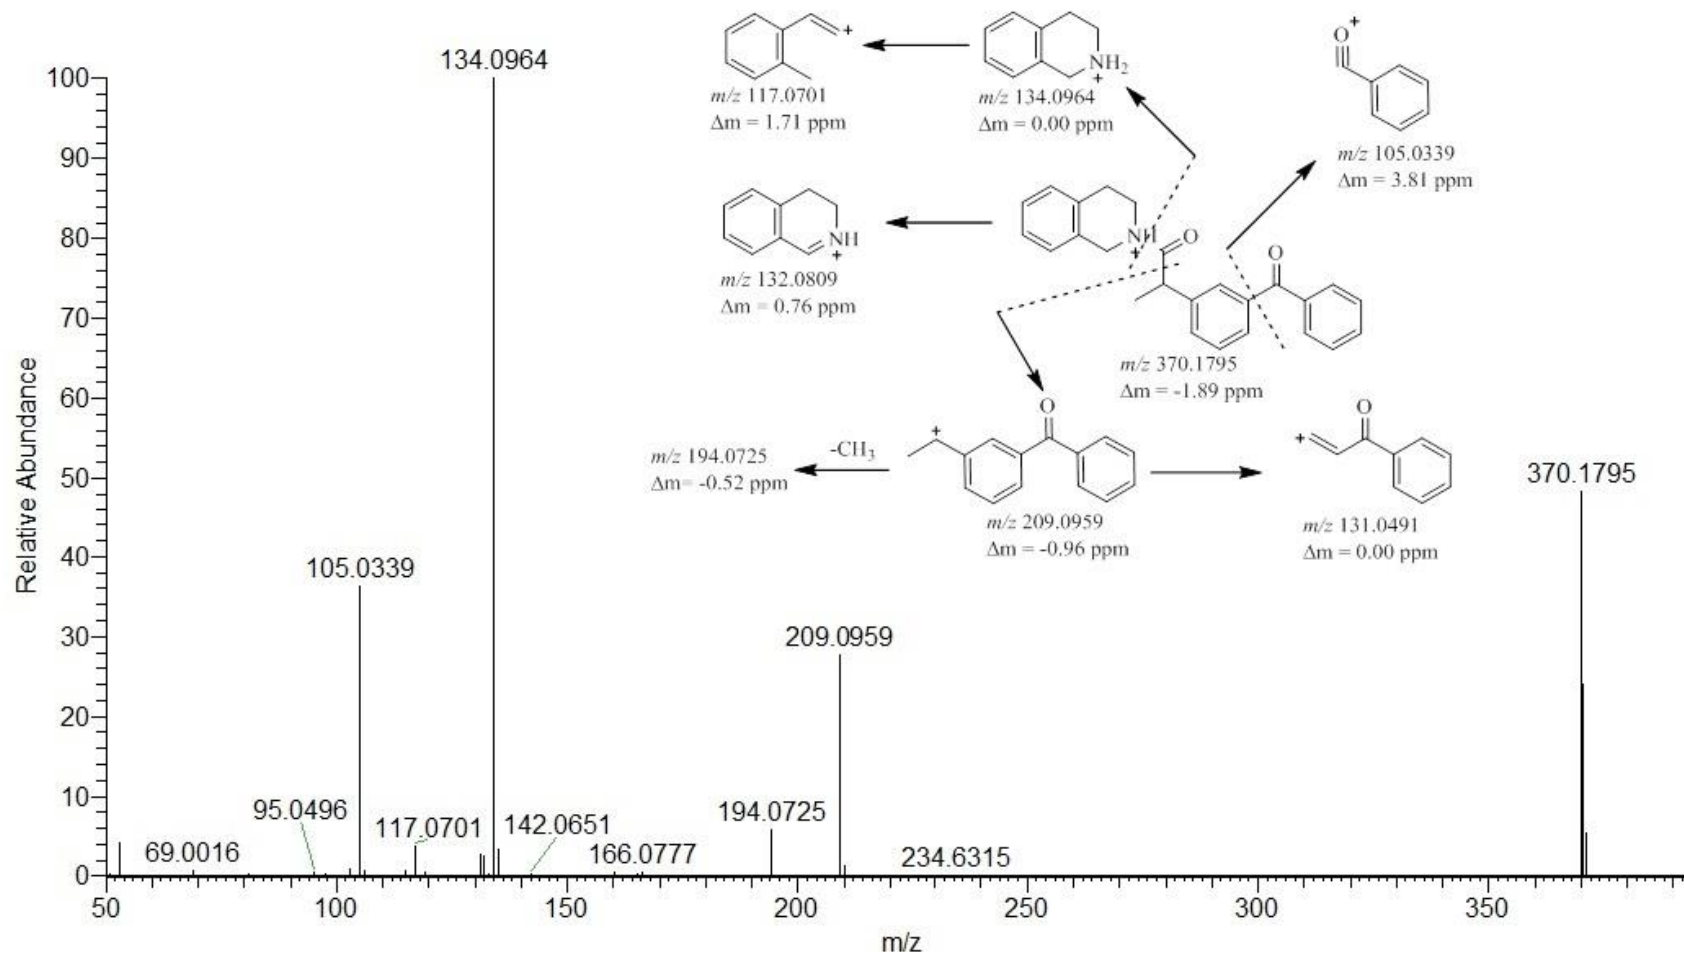

**Figure S20** Mass spectrum of **4d** obtained by positive ion ESI-MS/MS. Proposed fragmentation of protonated **3d**.

**Table S1.** RMSD of protein backbone, RMSD of ligands and RG of protein in the molecular dynamics study when ligands **3c** and **3d** were docked into the Sudlow 2 site.

| Parameter             | Compound 3c | Compound 3d |
|-----------------------|-------------|-------------|
| RMSD protein backbone |             |             |
| RMSD ligand           |             |             |
| RG of protein         |             |             |

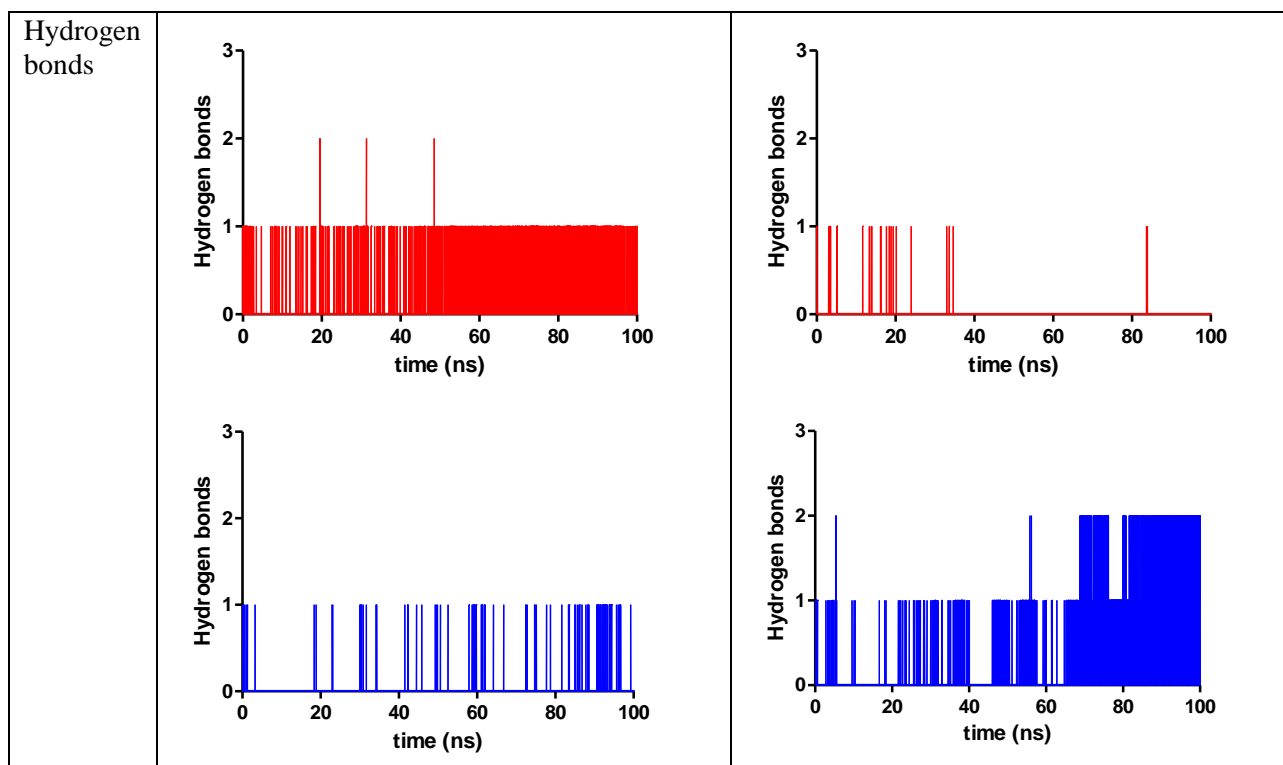

black: apo; red: R enantiomer, blue: S enantiomer

**Table S2.** RMSD of protein backbone, RMSD of ligands and RG of protein in the molecular dynamics study when ligands **3a** and **3b** were docked into the site 3 of albumin.

| Parameter                   | Compound 3a                                                                         | Compound 3b                                                                          |
|-----------------------------|-------------------------------------------------------------------------------------|--------------------------------------------------------------------------------------|
| RMSD<br>protein<br>backbone | 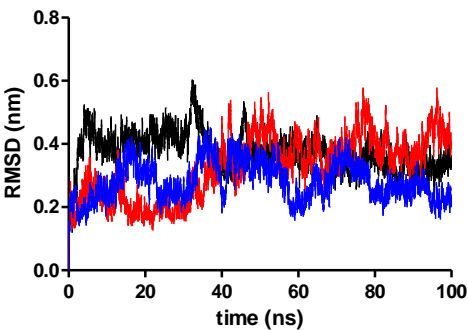   |    |
| RMSD<br>ligand              |   |   |
| RG of<br>protein            |  |  |
| Hydrogen<br>bonds           |  |  |

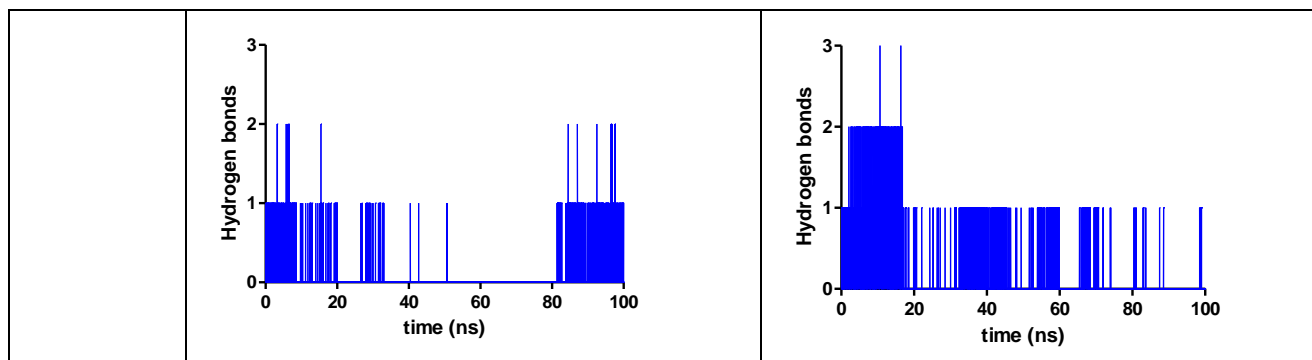

black: apo; red: R enantiomer, blue: S enantiomer

**Table S3.** RMSD of protein backbone, RMSD of ligands and RG of protein in the molecular dynamics study when ligands **3c** and **3d** were docked into the site 3 of albumin.

| Parameter             | Compound 3c | Compound 3d |
|-----------------------|-------------|-------------|
| RMSD protein backbone |             |             |
| RMSD ligand           |             |             |
| RG of protein         |             |             |
| Hydrogen bonds        |             |             |

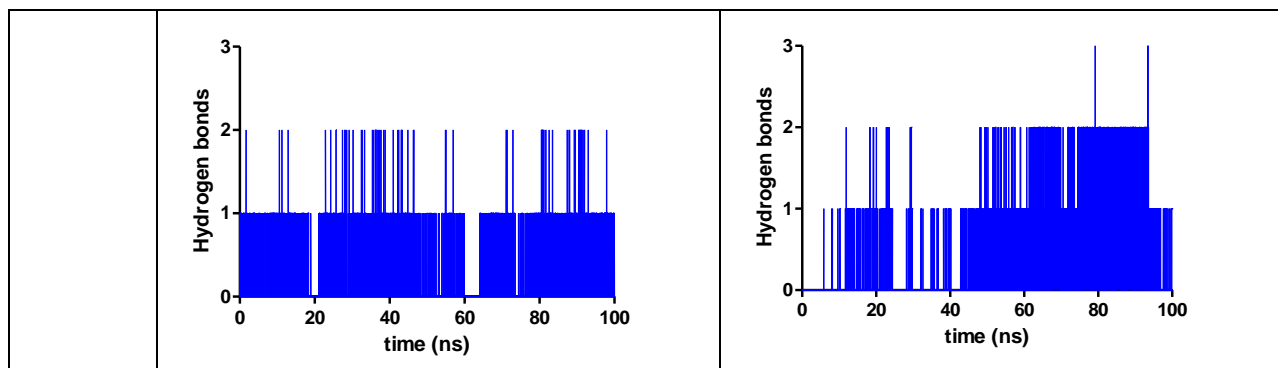

black: apo; red: R enantiomer, blue: S enantiomer

**Table S4.** RMSD of protein backbone, RMSD of ligands and RG of protein in the molecular dynamics study when ligands **3c** and **3d** were docked into the cleft of albumin.

| Parameter             | Compound 3c                                                                         | Compound 3d                                                                          |
|-----------------------|-------------------------------------------------------------------------------------|--------------------------------------------------------------------------------------|
| RMSD protein backbone | 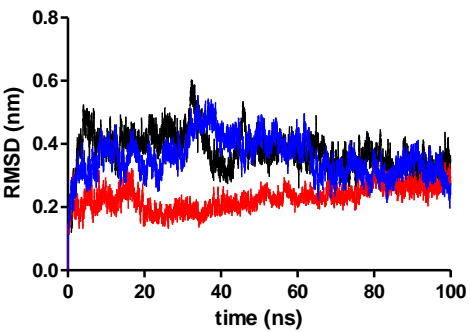   |    |
| RMSD ligand           |   |   |
| RG of protein         |  |  |
| Hydrogen bonds        |  |  |

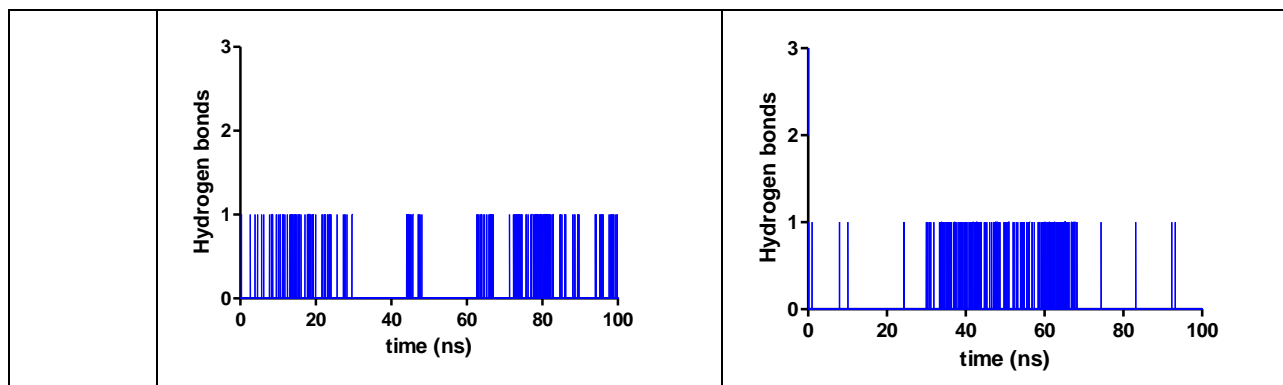

black: apo; red: R enantiomer, blue: S enantiomer
